# Supplementary material for: Advantages of zinc isotopes as a new dietary proxy in marine ecology
Source: Research Square preprint supplement (doi:10.21203/rs.3.rs-102358/v1), 2020-12-02
Supplement: Supplementary file 1 [file 99476d248b63eecb99e50df5.pdf]

## Supplementary Information

### Supplementary Text

#### Isotopic context

Marine  $\delta^{15}\text{N}$  and  $\delta^{13}\text{C}$  values of particulate organic matter (POM), the base of the marine food web, vary across oceanic basins<sup>5,24,25</sup>. Marine phytoplankton from high latitudes shows a particularly high variability in  $\delta^{13}\text{C}$  values<sup>77</sup>. Colder surface water temperatures lead to increasing aqueous  $\text{CO}_2$  content, and therefore a net transfer of isotopically light  $\text{CO}_2$  to the ocean and a depletion of  $^{13}\text{C}$  in the surface water<sup>78</sup>. Other factors influencing spatial POM  $\delta^{13}\text{C}$  values include phytoplankton growth rates, cell size and cell lipid content (see ref.<sup>5,77</sup> and ref. therein). Additional spatial variability may arise from the relative contribution of sea ice POM and pelagic POM to a food web. Coeval open water phytoplankton (pelagic-POM) and algae from beneath the sea ice (sympagic-POM) have differing  $\delta^{13}\text{C}$  values with the former being  $^{13}\text{C}$  depleted relative to the latter by 2-10 ‰<sup>52,79,80,81</sup>. Subtle shifts in Arctic consumers'  $\delta^{13}\text{C}$  values for a specific area over time may occur with large-scale shifts in the relative importance of sympagic versus pelagic production related to changes in sea ice extent<sup>4,43</sup>.

A high variability in modern baseline  $\delta^{15}\text{N}$  and  $\delta^{13}\text{C}$  values is documented by the isotopic composition of POM, zooplankton, higher trophic level consumers, as well as filter feeders across the Arctic<sup>6,27,28,29,30,31,32</sup>. Pomerleau et al.<sup>30</sup> documented a significant spatial variability in zooplankton  $\delta^{15}\text{N}$  values between the Labrador Sea, Baffin Bay and the Canadian Arctic Archipelago (CAA), but not  $\delta^{13}\text{C}$  between these areas. Subsequent studies documented a higher variability for  $\delta^{13}\text{C}$  of POM, zooplankton and high trophic level consumers between and within these areas as well<sup>31,32</sup>. Additionally, a pronounced west-east  $^{13}\text{C}$  depletion was observed throughout consumers from the Bering Sea (Bering Strait) through the Chukchi Sea to the Beaufort Sea<sup>6,27,28,31</sup>. A similar west-east trend was also found for sedimentary organic carbon accumulated along the Beaufort Shelf<sup>77</sup>. This eastward  $^{13}\text{C}$  depletion trend reaches its maximum in the south-eastern Beaufort Sea. Terrestrial organic matter derived from the Mackenzie River has  $\delta^{13}\text{C}$  values of  $\sim -26$  to  $-27$  ‰ and dominates over autochthonous organic matter in the delta and at least parts of the Beaufort shelf<sup>82</sup>. Terrigenous  $^{13}\text{C}$  depleted carbon is also thought to play an important role for some animals (gammarid amphipods) of the Mackenzie shelf's food web<sup>83</sup>. A similar variability in  $\delta^{15}\text{N}$  values between the Bering Sea, Chukchi Sea and Beaufort Sea is absent within animals of higher trophic levels<sup>6,55</sup>. However, geographic variations in  $\delta^{15}\text{N}$  values within these water bodies were observed for different zooplankton species<sup>6,28,31</sup>. Parson et al.<sup>83</sup> explained high  $\delta^{15}\text{N}$  in POM of the Mackenzie estuary instead of a low terrigenous signal as a potential bacterial recycling of nitrogen.

The eastward decrease of baseline  $\delta^{13}\text{C}$  values does not seem to continue into the CAA<sup>30,80</sup>, but significantly lower  $\delta^{13}\text{C}$  values have been reported in consumer tissues close to the Canadian mainland and in semi-enclosed basins<sup>56</sup>. In accordance, De La Vega et al.<sup>32</sup> observed higher baseline  $\delta^{13}\text{C}$  values in inflow shelves connected to the Atlantic or Pacific Oceans (Barents Sea, Chukchi Sea) and the North Water Polynya (Northern Baffin Bay) compared to lower baseline values in the more freshwater influenced Arctic shelves (Beaufort Sea, CAA, Hudson Bay). Lower baseline values for carbon in the more terrestrial influenced areas are likely a result of terrigenous input and lower phytoplankton productivity. Higher stratification caused by inflowing freshwater hampers phytoplankton productivity on the interior shelves<sup>84</sup>. Indeed, Bering and Chukchi Sea annual primary production rates greatly exceed those of the Beaufort Sea<sup>6</sup>.

Zn isotopes are increasingly being used as tracers for past marine hydrochemistry<sup>85,86</sup> and culture experiments have investigated Zn isotope fractionation in different planktonic species<sup>38,39</sup>. Still, there is hardly any data on the Zn isotopic composition of natural marine planktonic organisms<sup>87,88</sup>. Together with iron, Zn is the most abundant trace element in marine phytoplankton biomass<sup>89</sup>. Because of biological uptake, most oceans show a nutrient-like vertical distribution of dissolved zinc concentrations closely correlating with silicate concentrations<sup>40</sup>. The isotopic composition of dissolved Zn below 500 m seems to be globally homogenous with values close to +0.5 ‰, despite variable Zn concentrations<sup>35,36</sup>. Atlantic and Pacific vertical Zn isotope profiles generally show lower  $\delta^{66}\text{Zn}$  values in surficial waters compared to that of the deep water<sup>33,36,40,41,42</sup>. Surface water dissolved zinc isotope ratios vary across a North Atlantic transect from -1.1 to +0.9 ‰<sup>33</sup> and across a North Pacific transect between -0.9 and +0.2 ‰<sup>42</sup>. Individual and combined mechanisms discussed to be responsible for this surface water  $\delta^{66}\text{Zn}$  variability include external inputs from rivers and aerosols<sup>37,42</sup>, scavenging of heavy Zn onto sinking organic matter<sup>40</sup> and biological uptake and shallow remineralisation<sup>90</sup>. We are unaware of any  $\delta^{66}\text{Zn}$  data from dissolved Zn in the Arctic. However, a recent study on Western Arctic dissolved Zn concentrations highlighted a deviation of Zn concentration vertical profiles from the nutrient-type Zn profiles observed in the Atlantic and Pacific<sup>91</sup>. These authors documented higher than global average surface Zn concentrations (~1.1 nmol kg<sup>-1</sup>) with a maximum concentration at 200 m and uniformly lower concentrations in the deep water. Jensen et al.<sup>91</sup> hypothesises that Western Arctic surface water dissolved Zn originates primarily from incoming Pacific waters that are modified by shelf sediment fluxes from remineralised Zn-rich phytoplankton.

#### ***P. hispida* and *U. maritimus* diet**

*P. hispida* is not a highly specialised feeder and its diet can vary seasonally and geographically, and includes teleosts, amphipods and other crustaceans and cephalopods<sup>45,55,92</sup>. Its main food source is Arctic cod (*Boreogadus saida*) and other gadids for most Arctic regions<sup>54,92,93</sup>. Based on stomach content analysis, perfluoroalkyl compounds (PFCs),  $\delta^{15}\text{N}$  and  $\delta^{13}\text{C}$  tissue values across the Arctic, the diet of different *P. hispida* populations is known to vary locally and seasonally to some degree<sup>53,56,92</sup>. Still, modern *P. hispida* populations are thought to inhabit the same trophic level across the Arctic<sup>56</sup>.

*P. hispida* is the main food source for *U. maritimus* in the Arctic. However, modern polar bears are not a single cosmopolitan population<sup>62</sup> and the contribution of *P. hispida* to a bear's diet relative to other prey species (e.g., *Erignathus barbatus*, *Pagophilus groenlandicus*, *Phoca vitulina*, *Odobenus rosmarus*, *Delphinapterus leucas*) varies within different populations<sup>60,61</sup>. Additionally, *U. maritimus* may also scavenge the remains of larger whale species when available<sup>94</sup>. A contribution of terrestrial food to *U. maritimus* diet is negligible<sup>7</sup>.

#### **Archaeological context**

The materials analysed are derived primarily from occupations associated with the Thule Inuit, with a few exceptions. All sites have been dated by AMS <sup>14</sup>C as outlined in Supplementary Table 3 in which references are provided for publications providing additional details about these sites. For simplicity, when analysing geographic variability, the following sites were grouped together as a single location: OkRn-1 with OIRr-1, KTZ-304 with KTZ-087, PaJs-13 with PcJq-5 and PeJr-1.

## Supplementary Methods

### Mineral dissolution experiment

Bone samples and reference materials NIST SRM 1400 and NIST SRM 1486 were subjected to different dissolution methods to investigate the impact of the organic bone phases on its Zn isotope signal (Supplementary Figure 1). For that purpose, we resampled 26 *P. hispidus* bones to measure  $\delta^{66}\text{Zn}$  of the bulk bone, the mineral phase and the collagen phase of the same bone material. The column chromatography steps (3.1.2) for a quantitative recovery of sample Zn were the same for all samples regardless of the dissolution methods used.

#### Method 1: Mineral phase dissolution only

Samples were transferred into acid-cleaned 2 ml polypropylene microcentrifuge tubes and demineralised in 1 ml 1M hydrochloric acid (HCl) at room temperature. After two days of digestion, the demineralisation progress was checked with a glass pipette. If the samples were still hard, the solution was extracted after centrifugation, and another 1 ml HCl added to the residue containing tube. After another two days, the samples were checked again. For all samples, the collagen residue was soft and spongy no later than after four days, indicating complete demineralisation. The tubes were then centrifuged and the solution (dissolved mineral phase) was extracted for Zn isotope analyses. The remaining insoluble collagen was also collected (with 1 ml ultrapure water added). The dissolved mineral phase was evaporated in open (Savillex) perfluoroalkoxy (PFA) vials on a hotplate for 5 h at 120 °C, then re-dissolved in 1 ml hydrobromic acid (HBr, 1.5 M) and subsequently placed in an ultrasonic bath for 30 min.

Collagen samples for  $\delta^{66}\text{Zn}$  analyses were rinsed with ultrapure water, centrifuged, and rinsed again. Samples were then dried down and dissolved with 1 ml ultrapure (65 %) concentrated nitric acid ( $\text{HNO}_3$ ) for 1 h at room temperature followed by 1 h in a closed vial on the hotplate at 120 °C. Finally, samples were dried down for 5 h at 120 °C and re-dissolved in 1 ml 1.5M HBr and ultrasonicated for 30 min.

#### Method 2: Bone dissolution following enamel dissolution protocol

Bone samples were dissolved following an established protocol primarily applied to enamel samples<sup>11,14</sup>. Samples were dissolved in closed PFA vials with 1 ml 1M HCl on a hotplate for 3 h at 120 °C and then evaporated at 120 °C. The residue was then dissolved in 1 ml 1.5M HBr and placed in an ultrasonic bath for 30 min.

#### Method 3: Bulk bone dissolution

Bone samples were dissolved with 1 ml ultrapure (65 %) concentrated  $\text{HNO}_3$  for 1 h at room temperature in an open PFA vial, followed by 1 h in a closed vial, on a hotplate, at 120 °C. Samples were then dried down at 120 °C, re-dissolved in 1 ml 1.5 M HBr, and ultrasonicated for 30 min.

### Stable Carbon and Nitrogen Isotope Analyses

Carbon and nitrogen isotopic and elemental compositions were determined using an IsoPrime continuous flow isotope-ratio mass spectrometer (CF-IRMS) coupled to a Vario Micro elemental analyser (Elementar, Hanau, Germany) at the University of British Columbia. Sample measurements were calibrated relative to

VPDB ( $\delta^{13}\text{C}$ ) and AIR ( $\delta^{15}\text{N}$ ) using USGS40 and USGS41<sup>74</sup>. The standard deviations and number of calibration (quality control) standards used in all of the analytical sessions are listed in Supplementary Table 4.

Standards used to monitor accuracy and precision are listed in Supplementary Table 5. The isotopic compositions used as the accepted values for these internal standards represent long-term averages. Supplementary Table 6 summarises the mean and standard deviation of carbon and nitrogen isotopic compositions for all check (quality assurance) standards analysed alongside the samples presented in this study. All of the samples were analysed in at least duplicate. One internal standard (SUBC-1, seal bone collagen) was in the process of attaining an average long-term value, so we treated this as a sample replicate rather than a QA standard (155 aliquots of this material were analysed alongside these samples). The pooled standard deviations for the sample replicates were  $\pm 0.12$  ‰ for  $\delta^{13}\text{C}$  and  $\pm 0.14$  ‰ for  $\delta^{15}\text{N}$  ( $df=300$ ).

Standard uncertainty for the  $\delta^{13}\text{C}$  and  $\delta^{15}\text{N}$  measurements of the samples was estimated following Szpak et al.<sup>75</sup>, which largely follows the method presented in Magnusson et al.<sup>95</sup>. Systematic errors ( $u_{(bias)}$ ) were calculated to be  $\pm 0.08$  ‰ for  $\delta^{13}\text{C}$  and  $\pm 0.12$  ‰ for  $\delta^{15}\text{N}$  based on the known uncertainty in the check standards and the observed standard deviations of those check standards from the known values. Random errors ( $u_{R(w)}$ ) were calculated to be  $\pm 0.14$  ‰ for  $\delta^{13}\text{C}$  and  $\pm 0.17$  ‰ for  $\delta^{15}\text{N}$  based on the pooled standard deviations of the check standards and sample replicates. Standard uncertainty, calculated as the root-sum-square of  $u_{(bias)}$  and ( $u_{R(w)}$ ) was determined to be  $\pm 0.16$  ‰ for  $\delta^{13}\text{C}$  and  $\pm 0.21$  ‰ for  $\delta^{15}\text{N}$ .

## Supplementary Results

### Bone dissolution methods and Zn isotopy

The slow dissolution method with 1 M HCl (method 1) resulted in a complete demineralisation without destruction of the spongy bone collagen. Bones treated according to the enamel dissolution protocol (method 2) resulted in a complete demineralisation, but also an only incomplete collagen dissolution, evidenced by a flaky collagen residue in the solution. Treatment with concentrated nitric acid (method 3), resulted in a complete dissolution of the mineral and collagen phase (Supplementary Figure 1). Repeated analysis of the reference materials NIST SRM 1400 yielded mean  $\delta^{66}\text{Zn}$  values of  $0.95 \pm 0.02$  ‰,  $0.96 \pm 0.03$  ‰ and  $0.95 \pm 0.03$  ‰ when being dissolved with the dissolution methods 1, 2 and 3, respectively. Repeated analysis of the reference materials NIST SRM 1486 yielded mean  $\delta^{66}\text{Zn}$  values of  $1.24 \pm 0.03$  ‰,  $1.23 \pm 0.04$  ‰ and  $1.22 \pm 0.03$  ‰ when being dissolved with the dissolution methods 1, 2 and 3, respectively (Supplementary Figure 2). Both SRM reference materials have  $\delta^{66}\text{Zn}$  values that correspond to those published elsewhere<sup>11,13,14</sup> (Supplementary Table 2). Samples taken from the same bone sample and treated with different dissolution methods show a standard deviation for  $\delta^{66}\text{Zn}$  values between 0.00 and 0.11 ‰ (Supplementary Table 2). Mean standard deviation for bone samples treated with different dissolution methods (0.04 ‰) is close to the range of measurement uncertainty (0.01 to 0.03 ‰ 1SD). Mean standard deviation for replicate analyses of SRM reference materials and bone samples are for both 0.03 ‰ (1SD). Attempts to analyse the  $\delta^{66}\text{Zn}$  values of the isolated collagen after demineralisation following the first dissolution method were unsuccessful due to the too low Zn concentrations in the collagen samples ( $< 1.2$  µg/g bone).

## Supplementary Discussion

### Impact of collagen on bone $\delta^{66}\text{Zn}$ values and application for multi-proxy dietary studies

The treatment with different dissolution methods did not lead to any variation in the bone ash NIST SRM 1400 nor in the bone meal NIST SRM 1486  $\delta^{66}\text{Zn}$  values, despite the latter still containing a collagen organic component (Supplementary Figure 2). As with the SRM reference materials, the demineralisation methods tested herein did not lead to systematic significant variability in  $\delta^{66}\text{Zn}$  values of selected samples (Supplementary Table 2). Although we used archaeological bone samples for this study, their collagen content was still as high as in modern mammal bones (Supplementary Table 1). Minor variability between bone samples treated with different dissolution methods may arise from resampling of larger bone fragments and potential heterogeneities within a larger bone sample. While each method fully demineralised the bone, the extent of collagen dissolution varied: from collagen preservation to complete collagen dissolution (Supplementary Figure 1). After collagen extraction following the dissolution protocol 1, we tried to measure the Zn isotopic composition of the collagen relative to the mineral phase. However, demineralised collagen Zn concentrations were between 0.08 and 1.2  $\mu\text{g/g}$  bone, and therefore too low for zinc isotopic analyses. As such, Zn bonded to the organic phase in bones likely has no impact on bulk bone Zn isotopic compositions. It is possible that all Zn initially bonded to the organic phases of the bone may have been released during demineralisation regardless of the method used. However, the Zn concentration of the organic phase is likely too insignificant in comparison to that of the mineral phase.  $\text{Zn}^{2+}$  substitutes for  $\text{Ca}^{2+}$  in bioapatite<sup>96</sup> and synthesised hydroxylapatites<sup>97</sup>. The bone mineral phase acts as a sink for Zn, whereas Zn bound to the organic matrix appears to be volumetrically negligible compared to the bulk bone  $\text{Zn}^{98}$ .

The absence of an impact of collagen on bulk bone  $\delta^{66}\text{Zn}$  values has some important implications for the use of Zn in bone as a dietary proxy. Fossil bone samples can be treated like modern samples, independent of the collagen preservation, provided they show neither Zn detrital contamination nor diagenetic modification. Mineral phase  $\delta^{66}\text{Zn}$  can be coupled with collagen extraction protocols applied for  $\delta^{15}\text{N}$  and  $\delta^{13}\text{C}$  analyses on the same sample. Dissolution method 1 followed a protocol similar to common collagen extraction protocols applied for bone collagen  $\delta^{13}\text{C}$  and  $\delta^{15}\text{N}$  analysis. Thus,  $\delta^{66}\text{Zn}$  analysis could be routinely coupled with  $\delta^{15}\text{N}$  and  $\delta^{13}\text{C}$  on a single sample. Coupling of  $\delta^{66}\text{Zn}$  with  $\delta^{15}\text{N}$  and  $\delta^{13}\text{C}$  analyses will allow a more robust, complementary multi-proxy dietary reconstruction without the necessity to resample archaeological material. This is of particular interest for archaeological and palaeontological assemblages with small sized samples or samples too valuable for repeated destructive analyses (e.g., human remains). Additionally, collagen extraction does not always provide  $\delta^{15}\text{N}$  and  $\delta^{13}\text{C}$  results due to, for example, too low collagen content in the sample. However, if the dissolved phase is collected for Zn isotope analysis, these samples can still provide valuable dietary information and are thus not completely “lost”.

### Preservation of $\delta^{15}\text{N}$ , $\delta^{13}\text{C}$ and $\delta^{66}\text{Zn}$ values

All bone samples demonstrate exceptional bone collagen preservation based on collagen yields and elemental compositions (wt% C, wt% N, C:N ratios) within the range of modern mammal bone<sup>49,50</sup>. Diagenetic modification of original bone  $\delta^{66}\text{Zn}$  values may be expected following bone recrystallisation and associated accumulation or leaching of trace elements or secondary mineral precipitation. However, such diagenetic modifications are strongly associated with the loss of the organic matrix causing increased

porosity and bioapatite recrystallisation<sup>99,100</sup>. The excellent preservation of the collagen argues against significant diagenetic modification of the bioapatite Zn content. Reynard and Balter<sup>101</sup> suggested that diagenetic modification of trace element content might result in a correlation between concentration, expressed as 1/concentration, and isotopic composition of the element in question. We observe no correlation between  $\delta^{66}\text{Zn}$  and Zn concentrations when analysing all *P. hispida* or *U. maritimus* samples ( $R^2 = 1.38\text{e-}4$ ,  $p = 0.97$ ,  $R^2 = 1.20\text{e-}2$ ,  $p = 0.46$ , Supplementary Figure 3). The lack of a correlation suggests that soil Zn addition and/or diagenetic zinc incorporation into the bone samples did not contribute to the samples'  $\delta^{66}\text{Zn}$  value. Correlation of *P. hispida* zinc concentration and  $\delta^{66}\text{Zn}$  values within a single site is also typically weak or non-existent. However, for the KkJg-1 and JfEI-4 sites there seems to be a statistically significant correlation between  $\delta^{66}\text{Zn}$  and  $1/[\text{Zn}]$ , with  $R^2$  of 0.44 ( $n=11$ ,  $p = 0.03$ ) and 0.53 ( $n=9$ ,  $p = 0.01$ ). Still, post-hoc Tukey pair-wise comparisons show that  $\delta^{66}\text{Zn}$  values from both sites are not distinct from other sites in regards to their  $\delta^{66}\text{Zn}$  values. Mean  $\delta^{66}\text{Zn}$  values from the JfEI-4 site are the same as the mean values from the nearby KkDo-1 site (Fig. 2), which does not show a correlation between zinc isotopic composition and concentration. *P. hispida* bones from both the JfEI-1 and KkDo-1 sites have, as with  $\delta^{66}\text{Zn}$ , very similar  $\delta^{15}\text{N}$  and  $\delta^{13}\text{C}$  values, distinct from other geographic regions (Fig. 2, Supplementary Table 1), indicating preservation of original isotopic signals. Most importantly, for the JfEI-4 site *U. maritimus* samples show no correlation between  $\delta^{66}\text{Zn}$  and  $1/[\text{Zn}]$  ( $R^2 = 0.06$ ,  $n = 5$ ,  $p = 0.68$ ) arguing against a diagenetic alteration or contamination causing the correlation for *P. hispida* for this site. Instead of diagenetic modification or soil contamination, individual taxonomically misidentified bones could also explain correlations between proxies (including  $[\text{Zn}]$ ). Alternatively, these populations may include individuals with higher mobility or differences in diet.

Surface water dissolved-Zn concentrations and isotopic compositions are expected to vary within the surface water across the Arctic to some degree as observed in other oceans<sup>35,90</sup>. Mean site Zn concentration and  $\delta^{66}\text{Zn}$  values may therefore reflect variations in POM zinc concentration and isotopic composition passed along the food chain. Indeed, Zn concentrations in phytoplankton vary depending on Zn availability and primary producers<sup>102</sup>. In the Western Arctic for example, Zn:C stoichiometries for shelf phytoplankton were higher compared to offshore phytoplankton<sup>91</sup>. A weak correlation between  $\delta^{66}\text{Zn}$  and Zn concentrations within a population may arise from individuals that are more mobile or distinct in their diet. In any case, a much higher correlation would be expected between Zn concentration and isotopic composition if diagenetic Zn modification or soil contamination would be a dominant influence for the KkJg-1 and JfEI-4 sites. For example, more porous cancellous bone of *O. rosmarus* from the QjJx-1 site showed a much higher correlation ( $R^2 = 0.82$ ) between  $1/[\text{Zn}]$  and  $\delta^{66}\text{Zn}$  values, likely due to the cancellous bone retaining soil particles<sup>13</sup>.

For seal bone samples from the three sites JfEI-4, KcFs-2 and NkRi-3, taxonomic misidentification cannot be completely ruled out, i.e. some samples may also belong to other Phocidae than *P. hispida*. Additionally, the JfEI-4 site has, besides the QjJx-1 site, the highest on-site *P. hispida* bone  $\delta^{15}\text{N}$  and  $\delta^{66}\text{Zn}$  variability with 1.77 and 0.36 ‰, respectively. This could indicate that individual bones indeed belong to other Phocidae. Again, these sites generally have mean  $\delta^{15}\text{N}$ ,  $\delta^{13}\text{C}$  and  $\delta^{66}\text{Zn}$  values similar to other sites in the same geographic region (Fig. 2, Supplementary Table 1). The three sites JfEI-4, KcFs-2, NkRi-3 do not belong to the populations drawn out to be distinct from others by  $\delta^{66}\text{Zn}$  post-hoc Tukey pair-wise comparisons. If several bones from these sites would belong to different Phocidae, we may expect a higher isotopic variability for the sites, as some Phocidae were shown to have distinct  $\delta^{15}\text{N}$ ,  $\delta^{13}\text{C}$  and  $\delta^{66}\text{Zn}$  values due to differences in their diet<sup>13</sup>. Most importantly, however, *P. hispida* is by far the dominant

faunal component in Arctic archaeological sites<sup>47</sup>. We assume that most, if not all, Phocidae bone samples from these sites, indeed belong to *P. hispida*.

The typically high homogeneity in *P. hispida* and *U. maritimus* bone  $\delta^{15}\text{N}$ ,  $\delta^{13}\text{C}$  and  $\delta^{66}\text{Zn}$  values within a site (Supplementary Table 1) strongly argues against sample diagenesis, contamination issues and/or taxonomic misidentifications as a significant cause of isotopic variability within and between sites. However, it may explain unusual *P. hispida* outlier  $\delta^{15}\text{N}$  and  $\delta^{66}\text{Zn}$  values from the QjJx-1 site on Little Cornwallis Island<sup>13</sup>. Even excluding the one *P. hispida* sample from the QjJx-1 site with an unusually high  $\delta^{66}\text{Zn}$  values (1 ‰), post-hoc Tukey pair-wise comparisons draw out this population as distinct from others (Extended Data Figure 1). This population also has the highest variability of *P. hispida* bone collagen  $\delta^{15}\text{N}$  values (3.85 ‰) and a high variability in  $\delta^{13}\text{C}$  values (2.47 ‰). It is also possible that this variation originates from more mobile individuals within the population, or larger differences in food sources for individuals. Within a *P. hispida* population from Svalbard, Norway, Lone et al.<sup>103</sup> demonstrated, that 18 from 60 tagged individuals undertook extensive seasonal migrations. Individuals that are more mobile might consume a different type of prey in different regions, or prey for which tissue isotopic composition is influenced by different baseline values. If the samples from one site contain a higher percentage of bones from more mobile individuals, that population may have a higher  $\delta^{15}\text{N}$ ,  $\delta^{13}\text{C}$  and  $\delta^{66}\text{Zn}$  variability compared to others and perhaps demonstrate a correlation between different dietary proxies. For the KkJg-1 site in Hudson Bay, two *U. maritimus* samples show anomalously high  $\delta^{66}\text{Zn}$  values which may relate to non-dietary factors such as contamination, misidentification, diagenesis or physiological effects. One of these two outlier samples has a distinct dark pervasive colouration of the bone, which may imply contamination and/or preservation issues. A bone sample identified as *D. leucas* from the JfEl-4 site has an unusually low  $\delta^{15}\text{N}$  value (11.82 ‰). We have too little *D. leucas*  $\delta^{66}\text{Zn}$  values to draw a conclusion on its isotopic range. However, one *Odobenus rosmarus* bone from the same site has a similar  $\delta^{15}\text{N}$  and  $\delta^{13}\text{C}$  isotopic composition and an only slightly higher  $\delta^{66}\text{Zn}$  value (Supplementary Figure 4). We cannot exclude the possibility of taxonomic misidentification for the unusual *D. leucas* sample and have hence excluded it from further discussion. Still, a significant influence of diagenesis, soil contamination or taxonomically misidentified can be excluded for most samples.

### Baseline carbon and nitrogen isotope variability recorded in *P. hispida* bones

High geographic variability in consumer tissue  $\delta^{15}\text{N}$  and  $\delta^{13}\text{C}$  values limits their use as dietary proxies when studying highly mobile species or combining multiple geographically distinct populations. Post-hoc Tukey pair-wise comparisons demonstrate a large heterogeneity in  $\delta^{15}\text{N}$  and  $\delta^{13}\text{C}$  values between archaeological populations (Extended Data Figure 2-3). Most of the differences can be linked to geographic groups resulting in  $\delta^{15}\text{N}$  and  $\delta^{13}\text{C}$  values from populations of different regions plotting in distinct groups on  $\delta^{15}\text{N}$  versus  $\delta^{13}\text{C}$  plots (Fig. 1). We grouped sites from the Bering/Chukchi Sea, Amundsen and Coronation Gulf, CAA, North Water Polynya, Hudson Bay, and sites influenced by the Labrador Sea in the Hudson Strait and Frobisher Bay (Fig. 1 a). The most likely reasons for varying mean *P. hispida* bone  $\delta^{15}\text{N}$  and  $\delta^{13}\text{C}$  values between the sites is a potential difference in diet between populations, or variations in food web baseline  $\delta^{15}\text{N}$  and  $\delta^{13}\text{C}$  values.

A varying degree of high and low trophic level food can impact  $\delta^{15}\text{N}$  values but would have very little or no effect on  $\delta^{13}\text{C}$  values. Therefore, feeding on a different trophic level may contribute to  $\delta^{15}\text{N}$  variability between the archaeological sites, but cannot explain the differences observed in their  $\delta^{13}\text{C}$  values. Additionally, modern *P. hispida* across the Arctic is believed to feed on a similar trophic level<sup>56</sup>. Different

populations may have also relied to a varying degree on benthic *versus* pelagic foraging. Benthic animals tend to be  $^{13}\text{C}$  and  $^{15}\text{N}$  enriched compared to pelagic animals<sup>104</sup>. However, a more benthic *versus* pelagic diet alone is an unlikely explanation for the full range of bone  $\delta^{15}\text{N}$  and  $\delta^{13}\text{C}$  values observed between the archaeological sites in this study. Seasonal shifts in modern *P. hispida* muscle  $\delta^{13}\text{C}$  values interpreted as changes in diet from a pelagic open-water to a more ice-cover and/or benthic diet were less than 1 ‰<sup>53</sup>. As with muscle  $\delta^{13}\text{C}$  values, these authors observed a similar pattern for muscle  $\delta^{15}\text{N}$  values with lower values during the open water period. However, the shift in  $\delta^{15}\text{N}$  was even lower and statistically non-significant<sup>53</sup>. Still,  $\delta^{15}\text{N}$  and  $\delta^{13}\text{C}$  values have a weak correlation for *P. hispida* (Fig. 1 b) between all *P. hispida* samples ( $R^2=0.21$ ,  $p < 0.05$ ), which could indicate that differences in food source between populations contribute to the observed  $\delta^{15}\text{N}$  and  $\delta^{13}\text{C}$  site variability. However, the correlation between  $\delta^{15}\text{N}$  and  $\delta^{13}\text{C}$  values could also be explained by baseline variability. Depending on the controlling factor, baseline  $\delta^{15}\text{N}$  and  $\delta^{13}\text{C}$  variations may follow the same direction, for example with lower values for both with decreasing productivity and/or increased terrestrial nutrient input<sup>28</sup>.

Here we observe similar trends in mean  $\delta^{13}\text{C}$  values from *P. hispida* bone collagen as observed in modern POM<sup>32</sup> with generally higher values at sites with connections to more open marine areas and lower values in the CAA, Hudson Bay and Beaufort Sea (Fig. 1, 2 a, b). Our archaeological data also agrees in variability and general geographic spacing with modern *P. hispida* muscle tissue  $\delta^{13}\text{C}$  variability observed throughout the Arctic. Modern muscle tissue  $\delta^{13}\text{C}$  values can vary up to 5 ‰ between geographically distinct populations<sup>51,52,53,54</sup>. As with the archaeological record, the lowest values in modern *P. hispida* tissue are also observed close to the Canadian mainland<sup>55,56</sup>. Despite investigating samples from only one area in the Bering Strait/Southern Chukchi Sea, our results agree well with the documented pronounced west-east  $^{13}\text{C}$  depletion in consumers throughout the Chukchi Sea and Beaufort Sea<sup>6,27,28,31</sup>. The lowest mean  $\delta^{13}\text{C}$  values in *P. hispida* bone collagen were also reported from the area SE Beaufort Sea/Amundsen Gulf extending even into the Coronation Gulf, while the highest mean value can be found in bones from the Bering Strait (Fig. 1, 2 a). The up to 3.4 ‰ lower mean  $\delta^{13}\text{C}$  values between *P. hispida* bone collagen from the SE Beaufort Sea/Amundsen Gulf relative to the Bering Strait sites is comparable to previously reported  $\delta^{13}\text{C}$  gradients for zooplankton ( $\sim 4.8$  ‰,  $\sim 3.3$ – $3.8$  ‰)<sup>27,28</sup>, secondary consumers ( $< 2.4$  ‰)<sup>6</sup> and filter feeders ( $< 6.4$  ‰)<sup>6</sup>, between these water bodies.

As for *P. hispida*  $\delta^{15}\text{N}$  in this study, previous studies have not shown a  $\delta^{13}\text{C}$  comparable geographic variation of nitrogen isotopic compositions between the Bering Sea, Chukchi Sea and Beaufort Sea areas within animals of higher trophic levels<sup>6,55</sup>. We observe the lowest  $\delta^{15}\text{N}$  values for *P. hispida* bone collagen in the most eastern sites from the Hudson Strait and East Baffin Island in proximity to the Labrador Sea which links the Atlantic to the Hudson Bay and Baffin Bay (Fig. 1 a, 2 b). These lower values are in good agreement with zooplankton based  $\delta^{15}\text{N}$  Atlantic isoscapes, showing an increase in baseline  $\delta^{15}\text{N}$  values from the Labrador Sea towards Baffin Bay and CAA values<sup>26</sup>. Corresponding with our archaeological bone collagen  $\delta^{15}\text{N}$  values (Fig. 2 b), modern muscle and liver tissue of *P. hispida* has lower values (14.7 ‰) in populations from the Labrador Sea relative to populations in terrestrial influenced regions close to the Canadian mainland in the CAA (17.2 to 17.9 ‰), such as the Amundsen Gulf and Rae Strait<sup>55,56</sup>.

Accordingly, dietary differences between populations may contribute to some of the observed bone  $\delta^{15}\text{N}$  and  $\delta^{13}\text{C}$  variability between archaeological sites. However, the carbon and nitrogen isotopic variability between the archaeological sites is in good agreement with modern geographical variations from zooplankton, food web and *P. hispida* tissue isotope datasets. We therefore assume geographically



varying food web baseline isotope values to be the main factor controlling the major isotopic variability between the sites.

### Possible non-dietary controls on isotopic trophic discrimination factors

The significant variability in  $\Delta^{15}\text{N}_{U. maritimus - P. hispida}$  (2.21 to 7 ‰) highlights the difficulties of assigning a trophic level to species across multiple locations using  $\delta^{15}\text{N}$  values alone, particularly in archaeological material. Multiple factors may produce the inter-site  $\Delta^{15}\text{N}_{U. maritimus - P. hispida}$  as well as  $\Delta^{66}\text{Zn}_{U. maritimus - P. hispida}$  variability; for example, relative differences in the consumption of higher and lower trophic level prey. However, feeding at substantially different trophic levels is incompatible with modern *U. maritimus* population trophic levels and diet variability<sup>60,61</sup>. Additionally, most other *U. maritimus* prey species feed on lower or similar trophic levels relative to *P. hispida*<sup>8,105</sup>. It is possible that due to the low intra-site sample size for both or either species, our site mean isotopic values do not capture the true means of the different populations. As the bones analysed are from individuals hunted or scavenged by humans, we cannot exclude differences in the segments of a *P. hispida* population hunted by humans and *U. maritimus*. For example, remains of *P. hispida* pups are very rare in archaeological assemblages<sup>47,106</sup>. *U. maritimus*, however, regularly preys on *P. hispida* pups and the contribution of pups to its diet may vary for different individuals, populations and with seal productivity<sup>107,108</sup>. As pups rely on their mother's milk, they effectively feed on a different trophic level leading to higher collagen  $\delta^{15}\text{N}$  values than adults<sup>109</sup>. Consequently, a higher consumption of *P. hispida* pups by *U. maritimus* relative to humans can lead to higher  $\Delta^{15}\text{N}_{U. maritimus - P. hispida}$  values within an archaeological assemblage. Additional uncertainties for inter-site  $\Delta^{15}\text{N}_{U. maritimus - P. hispida}$  values may arise from a higher contribution of migratory species such as *D. leucas*<sup>110</sup> to the diet of certain *U. maritimus* populations<sup>61</sup>. It remains, as of yet, unclear if and how physiological effects may influence  $\delta^{66}\text{Zn}$  variability within a population. However, dietary differences as well as effects related to an archaeological assemblage (e.g., not capturing true population means) might have a similar effect on  $\Delta^{66}\text{Zn}_{U. maritimus - P. hispida}$  as on  $\Delta^{15}\text{N}_{U. maritimus - P. hispida}$ .

### Trophic level assessment

In order to establish the relationship between bone  $\delta^{66}\text{Zn}$  and trophic level for the Arctic mammals of this study, we first had to assess the trophic level of every single animal. To do so, we used the following equation based on  $\delta^{15}\text{N}$  values established by Hobson and Welch<sup>8</sup>:

$$\text{TL} = 1 + (\delta^{15}\text{N} - 5.4)/3.8 \quad (\text{Supplementary Equation 1})$$

Where TL is the consumer trophic level and the  $\delta^{15}\text{N}$  enrichment value is +3.8 ‰ corresponding to the trophic level spacing of TL = +1 between *P. hispida* and *U. maritimus*<sup>8</sup>. In the Lancaster Sound region (LSR) where this relationship was established, *U. maritimus* almost exclusively feed on this specific species of seals<sup>8</sup>.

The average trophic level of the Arctic animals for which both  $\delta^{15}\text{N}$  and  $\delta^{66}\text{Zn}$  values are available (ref.<sup>13</sup> and this study) calculated following Supplementary Equation 1 are given Supplementary Table 7 (extreme outlier values were excluded; see also Supplementary Figure 5)

The  $\delta^{15}\text{N}$  trophic level positions are in good agreement with the previous findings of Hobson and Welch<sup>8</sup> for the LSR as well as other locations<sup>52,105,111</sup>. However, these TL estimations only represent oversimplified estimations, not considering population specific dietary differences, location specific baseline variations and organism specific trophic and tissue-type enrichment factors.

Based on the nitrogen isotope data we established two equations to estimate the trophic level of marine mammals using bone  $\delta^{66}\text{Zn}$  values (Supplementary Equations 2 and 3).

$$\text{TL} = -2.76 * \delta^{66}\text{Zn} + 5.48 \quad (\text{Supplementary Equation 2})$$

With a  $R^2=0.57$ .

Without including the *O. rosmarus* bones, the relationship becomes:

$$\text{TL} = -2.64 * \delta^{66}\text{Zn} + 5.48 \quad (\text{Supplementary Equation 3})$$

With a  $R^2=0.64$ .

Supplementary Equation 3 predicts a  $\delta^{66}\text{Zn}$  bone value of 1.32 ‰ for a TL = 2, and 0.94 ‰ for a TL = 3 which is very close to that seen in bones of terrestrial herbivores (TL = 2) and carnivores (TL = 3)<sup>11</sup>. Applying Supplementary Equation 3 to modern terrestrial mammal bones from Koobi Fora (Kenya)<sup>11</sup> gives us a TL of 1.8 for the average herbivore value (*Madoqua guentheri*, *Tragelaphus imberis*, *Litocranius walleri*, *Damaliscus korrigum*, *Oryx beisa*, *Equus burchelli*) and 3.3 for combined carnivores (*Felis leo*, *Caracal caracal*, *Canis sp.*, *Felis silvestris*).

The  $\delta^{66}\text{Zn}$  TL estimates are generally in agreement with the species respective trophic positions (Supplementary Table 8, Supplementary Figure 5). *Erignathus barbatus*  $\delta^{66}\text{Zn}$  estimated TL is lower than reported by Hobson & Welch<sup>8</sup> and Hobson et al.<sup>52</sup> (TL = 4.0 to 4.3), but it is close to the TL estimate (TL = 3.4) of Pauly et al.<sup>105</sup>. *O. rosmarus* bone  $\delta^{66}\text{Zn}$  values do not seem to reflect their trophic position.  $\delta^{66}\text{Zn}$  TL estimates for *O. rosmarus* place it at 4.0 to 4.1, which is too high based on its diet. *O. rosmarus* feed mostly on molluscs, especially filter-feeding bivalves such as *Mya truncata* and *Hiatella arctica*<sup>112</sup>. *O. rosmarus* is therefore primarily a benthic feeder, whereas the other mammals primarily feed along a pelagic-based trophic chain (pelagic POM - zooplankton - planktivorous fish - piscivorous fish - piscivorous mammals - carnivorous mammals). *O. rosmarus* might be considered as feeding of a different food web, we thus recommend the use of Supplementary Equation 3 for calculating mammal TL based on bone  $\delta^{66}\text{Zn}$  values. Benthic food webs can also differ in  $\delta^{15}\text{N}$  and  $\delta^{13}\text{C}$  compared to pelagic food webs<sup>104,113</sup>. Additional  $\delta^{66}\text{Zn}$  analysis is required to investigate whether a primarily benthic invertebrate based diet results in a different  $\delta^{66}\text{Zn}$  baseline or different Zn fractionation within consumers relative to consumers feeding along a primarily pelagic-based trophic chain. If so, then combining  $\delta^{66}\text{Zn}$  with  $\delta^{15}\text{N}$  and  $\delta^{13}\text{C}$  analysis may be a powerful approach to identify not only relative trophic positions, but also habitat use and benthic versus pelagic dietary preferences.

Dissolution method:

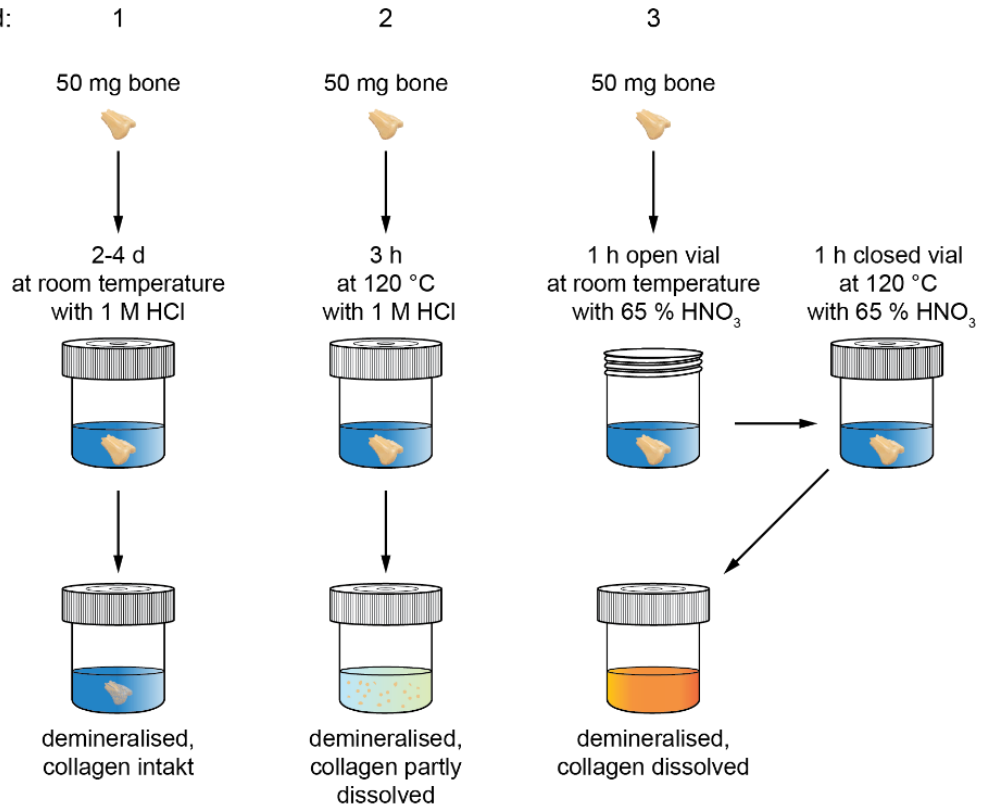

**Supplementary Figure 1:** Dissolution methods used to test the impact of collagen on bone mineral  $\delta^{66}\text{Zn}$  values.

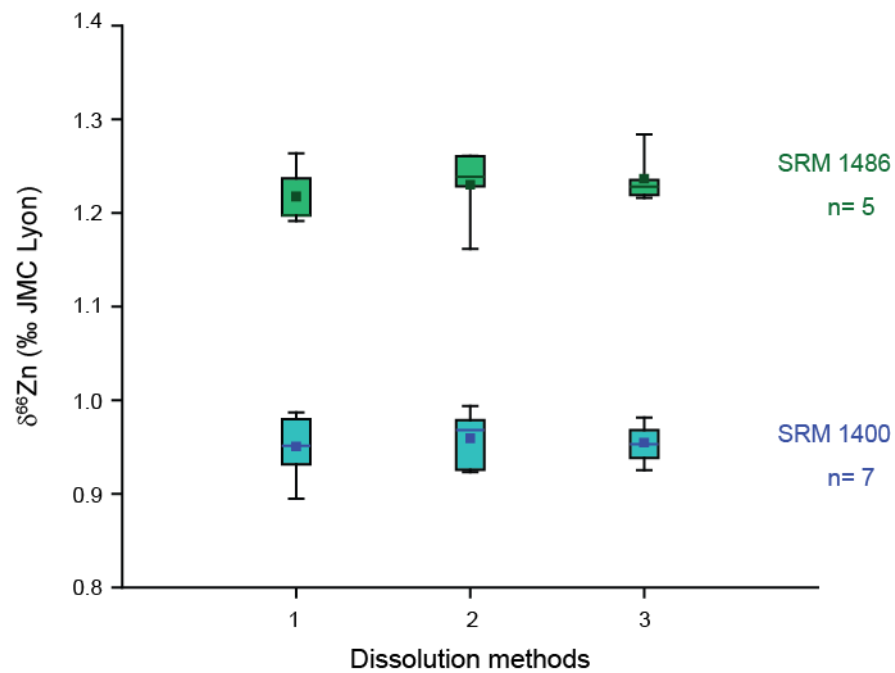

**Supplementary Figure 2:** Bone ash NIST SRM 1400 and bone meal NIST SRM 1486  $\delta^{66}\text{Zn}$  values obtained by applying different dissolution methods described in Supplementary Methods and Supplementary Figure

1. The boxes from the box and whisker plots represent the 25th–75th percentiles, with the median as a bold horizontal line and mean value as a dark filled box.

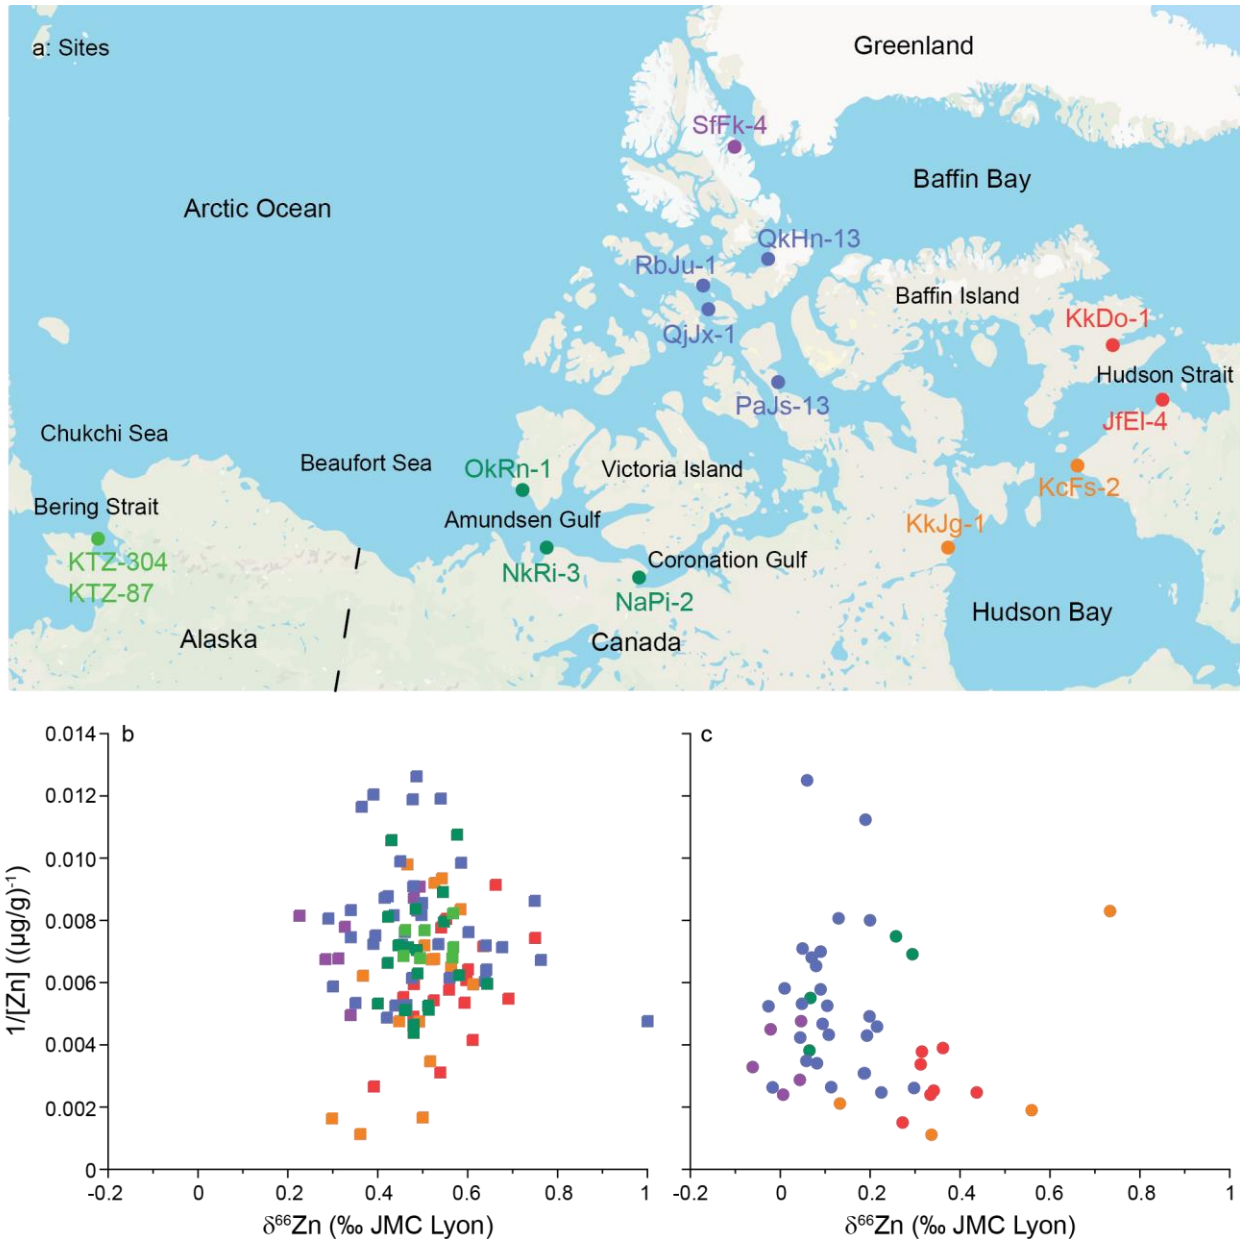

**Supplementary Figure 3:**  $\delta^{66}\text{Zn}$  versus zinc concentrations  $[\text{Zn}]$  expressed as  $1/[\text{Zn}]$  for *P. hispidus* (b) and *U. maritimus* (c). Samples are colour coded after map (a) indicating the archaeological sites analysed. Colour coding: Light green for the Bering Strait; dark green for the Amundsen and Coronation Gulf; blue for the CAA; orange for the Hudson Bay; purple for North Water Polynya; and red for sites influenced by the Labrador Sea in the Hudson Strait and Frobisher Bay. An extreme outlier *P. hispidus* value ( $\delta^{66}\text{Zn} = 1.00$ ‰, from QjJx-1<sup>13</sup>) is included. The map is redrawn after [www.google.com/maps](http://www.google.com/maps).

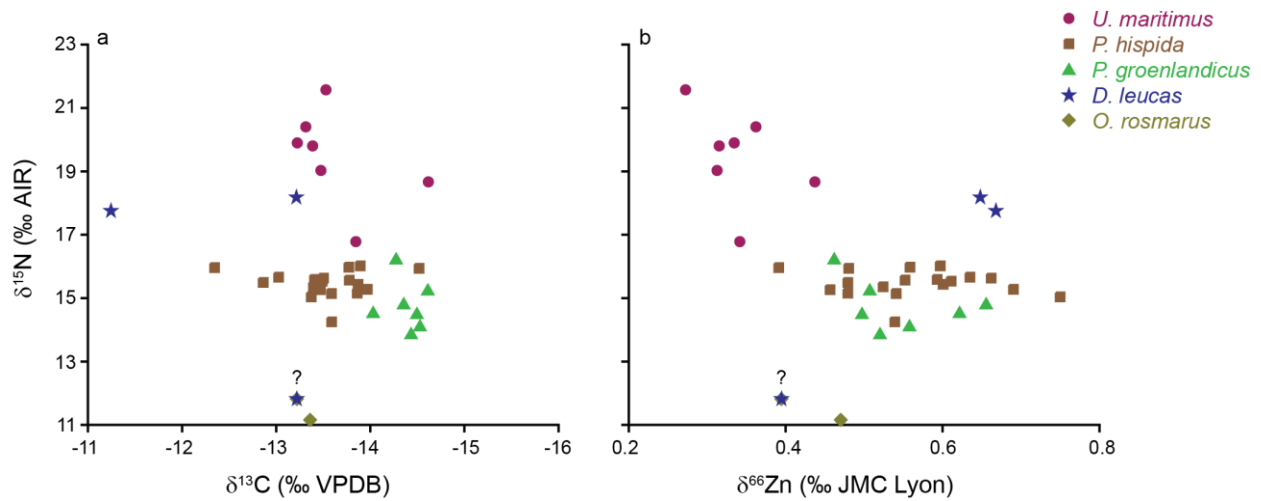

**Supplementary Figure 4:**  $\delta^{15}\text{N}$  versus  $\delta^{13}\text{C}$  (a),  $\delta^{15}\text{N}$  versus  $\delta^{66}\text{Zn}$  (b) of *U. maritimus* (dots), *P. hispida* (squares), *P. groenlandicus* (triangle), *D. leucas* (star) and *O. rosmarus* (diamond) bones for the combined KkDo-1 and JfEl-4 sites. A bone sample identified as a *D. leucas* with an unusually low  $\delta^{15}\text{N}$  value is indicated by a star overlying a diamond and marked with a question mark. We cannot exclude the possibility of taxonomic misidentification for that sample.

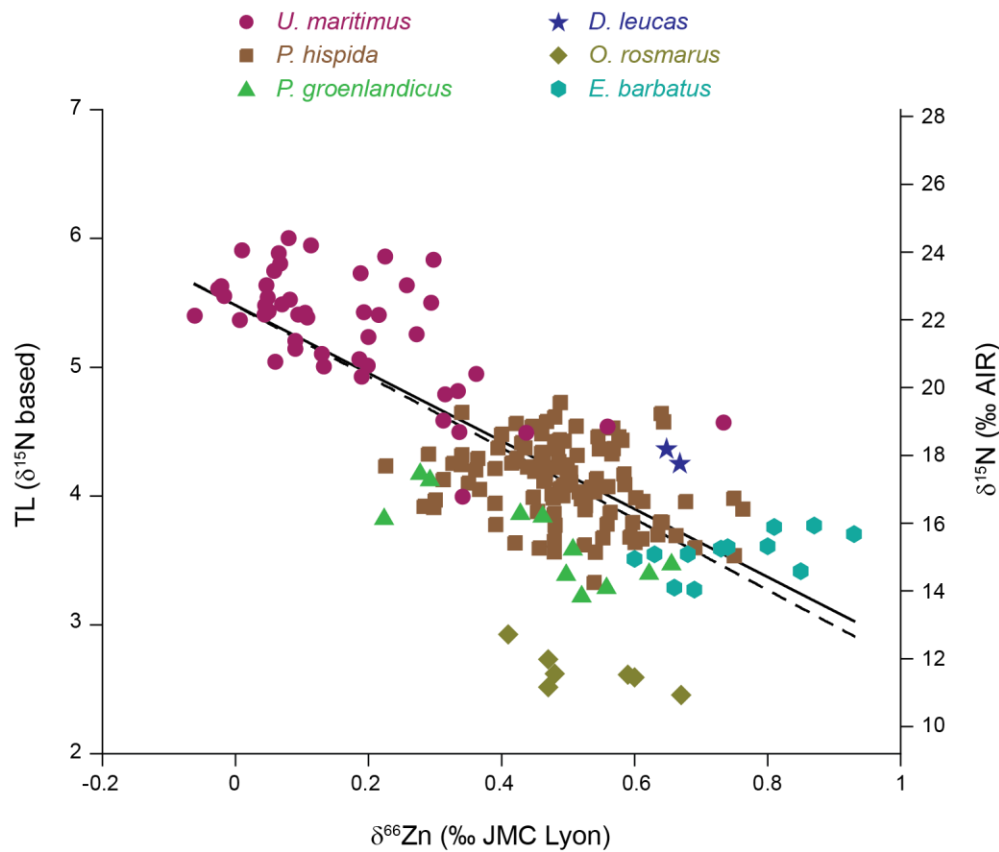

**Supplementary Figure 5:** TL calculated using  $\delta^{15}\text{N}$  and  $\delta^{15}\text{N}$  versus  $\delta^{66}\text{Zn}$  bone values for all species analysed herein together with ref.<sup>13</sup>. Dashed line represents the linear fit including *O. rosmarus* samples ( $p$ -value < 0.05;  $R^2 = 0.57$ ;  $n = 183$ , Supplementary Equation 2), solid line represents the linear fit excluding *O. rosmarus* samples ( $p$ -value < 0.05;  $R^2 = 0.64$ ;  $n = 176$ , Supplementary Equation 3). Two extreme outlier samples based on their  $\delta^{66}\text{Zn}$  values from the QjJx-1 site (*P. hispida* 1.00 ‰; *E. barbatus* 1.39 ‰)<sup>13</sup> and one based on its  $\delta^{15}\text{N}$  value from the JfEl-4 site (*D. leucas*? 11.82 ‰) were excluded. Additionally, only cortical bone  $\delta^{66}\text{Zn}$  values for *O. rosmarus* from the QjJx-1 site were used.

**Supplementary Table 1.**  $\delta^{13}\text{C}$ ,  $\delta^{15}\text{N}$  and  $\delta^{66}\text{Zn}$  dataset used in this study. Also included is the collagen (yield) weight % of carbon (wt. % C) and nitrogen (wt. % N), the collagen atomic carbon:nitrogen ratio (C/N), the bone mineral  $\delta^{67}\text{Zn}$  and  $\delta^{68}\text{Zn}$  values and Zn concentrations [Zn]. This dataset includes bone samples for which collagen  $\delta^{13}\text{C}$  and  $\delta^{15}\text{N}$  values were already reported elsewhere<sup>4,13,43,44</sup> as well as one site for which  $\delta^{66}\text{Zn}$  was already reported<sup>13</sup> (sheet 1 in the accompanying .xlsx file).

**Supplementary Table 2.**  $\delta^{66}\text{Zn}$  values for samples and reference material dissolved using different dissolution methods (Supplementary Methods, Supplementary Figure 1, 2).  $\delta^{66}\text{Zn}$  values for samples and differences in  $\delta^{66}\text{Zn}$  of bone material resampled and dissolved using the different dissolution methods ( $\Delta^{66}\text{Zn}$ ; sheet 1 in the accompanying .xlsx file).  $\delta^{66}\text{Zn}$  values for reference materials using the different dissolution methods (sheet 2 in the accompanying .xlsx file).

**Supplementary Table 3.** Archaeological sites analysed in this study with approximate age of the bone samples and additional references.

| Site    | Approximate age (calibrated years BP) | Reference                                                              |
|---------|---------------------------------------|------------------------------------------------------------------------|
| KTZ-304 | 650–850                               | Darwent <i>et al.</i> (2013) <sup>114</sup>                            |
| KTZ-087 | 350–550                               | Darwent <i>et al.</i> (2013) <sup>114</sup>                            |
| NkRi-3  | 650–750                               | Moody & Hodgetts (2013) <sup>47</sup>                                  |
| NaPi-2  | 550–650                               | Morrison (1983) <sup>115</sup>                                         |
| RbJu-1  | 3900–4100                             | McGhee (1979) <sup>116</sup>                                           |
| QkHn-13 | 3400–3800                             | Helmer (1991) <sup>117</sup>                                           |
| OkRn-1  | 300–500                               | Kotar (2016) <sup>118</sup>                                            |
| OIRr-1  | 650–750                               | Manning (1956) <sup>119</sup>                                          |
| QjJx-1  | 600–1100                              | Rick (1980) <sup>120</sup>                                             |
| PaJs-13 | 550–650                               | Savelle & Habu (2004) <sup>121</sup>                                   |
| PcJq-5  | 550–650                               | Rick (1980) <sup>120</sup>                                             |
| PeJr-1  | 550–650                               | Rick (1980) <sup>120</sup>                                             |
| KkJg-1  | 325–500                               | Staab (1979) <sup>122</sup><br>Dyke <i>et al.</i> (2019) <sup>48</sup> |
| KcFs-2  | 450–1450                              | Thompson (2011) <sup>123</sup>                                         |
| JfEl-4  | 550–700                               | Badgley (1980) <sup>124</sup>                                          |
| KkDo-1  | 650–150                               | Stenton (1987) <sup>125</sup>                                          |
| SfFk-4  | 550–650                               | Howse (2013) <sup>126</sup>                                            |

**Supplementary Table 4.** Standard deviations for the carbon and nitrogen isotopic compositions of the calibration standards used in all analytical sessions associated with the data presented in this paper.

| Standard | <i>n</i> | $\delta^{13}\text{C}$ ( $\pm 1\sigma$ ) | $\delta^{15}\text{N}$ ( $\pm 1\sigma$ ) |
|----------|----------|-----------------------------------------|-----------------------------------------|
| USGS40   | 450      | 0.06                                    | 0.18                                    |
| USGS41   | 438      | 0.18                                    | 0.12                                    |

**Supplementary Table 5.** Isotopic reference materials used to monitor internal accuracy and precision.

| Standard   | Material                           | Mean $\delta^{13}\text{C}$ (‰, VPDB) | Mean $\delta^{15}\text{N}$ (‰, AIR) |
|------------|------------------------------------|--------------------------------------|-------------------------------------|
| MET        | Methionine <sup>a</sup>            | -28.61 $\pm$ 0.10                    | -5.04 $\pm$ 0.13                    |
| NIST-1577c | Bovine liver <sup>a</sup>          | -17.52 $\pm$ 0.09                    | +8.15 $\pm$ 0.14                    |
| SRM-1      | Caribou bone collagen <sup>a</sup> | -19.40 $\pm$ 0.08                    | +1.83 $\pm$ 0.11                    |
| SRM-2      | Walrus bone collagen <sup>a</sup>  | -14.77 $\pm$ 0.12                    | +15.59 $\pm$ 0.13                   |
| USGS42     | Human hair                         | -21.09 $\pm$ 0.10                    | +8.05 $\pm$ 0.10                    |
| USGS43     | Human hair                         | -21.28 $\pm$ 0.10                    | +8.44 $\pm$ 0.10                    |
| IAEA-CH-3  | Cellulose                          | -24.72 $\pm$ 0.04                    | –                                   |

a. Internal standard with mean isotopic compositions representing long-term values as measured in three different laboratories.

**Supplementary Table 6.** Mean and standard deviations of all the check (QA) standards analysed in the analytical sessions associated with data presented in this paper.

| Standard   | <i>n</i> | $\delta^{13}\text{C}$ (‰, VPDB) | $\delta^{15}\text{N}$ (‰, AIR) |
|------------|----------|---------------------------------|--------------------------------|
|            |          | Mean $\pm$ 1 $\sigma$           | Mean $\pm$ 1 $\sigma$          |
| MET        | 357      | -28.61 $\pm$ 0.07               | -5.03 $\pm$ 0.13               |
| NIST-1577c | 134      | -17.52 $\pm$ 0.09               | +8.15 $\pm$ 0.12               |
| SRM-1      | 123      | -19.32 $\pm$ 0.07               | +1.81 $\pm$ 0.12               |
| SRM-2      | 114      | -14.74 $\pm$ 0.10               | +15.60 $\pm$ 0.08              |
| USGS42     | 4        | -21.09 $\pm$ 0.02               | +7.98 $\pm$ 0.03               |
| USGS43     | 3        | -21.28 $\pm$ 0.02               | +8.41 $\pm$ 0.06               |
| IAEA-CH-3  | 4        | -24.70 $\pm$ 0.05               |                                |



**Supplementary Table 7.**  $\delta^{15}\text{N}$  based trophic level (TL) estimates following Supplementary Equation 1<sup>8</sup>. SD = standard deviation, n = number of individuals/bone samples. Two extreme outlier samples based on their  $\delta^{66}\text{Zn}$  values from the QjJx-1 site (*P. hispida* 1.00 ‰; *E. barbatus* 1.39 ‰) and one based on its  $\delta^{15}\text{N}$  value from the JfEl-4 site (*D. leucas*? 11.82 ‰) were excluded. Additionally, only cortical bone  $\delta^{66}\text{Zn}$  values for *O. rosmarus* from the QjJx-1 site were used.

| Species                 | This study and Jaouen et al., 2016b |      |     | Hobson & Welch (1992)    |   |
|-------------------------|-------------------------------------|------|-----|--------------------------|---|
|                         | $\delta^{15}\text{N}$ TL            | SD   | n   | $\delta^{15}\text{N}$ TL | n |
| <i>U. maritimus</i>     | 5.3                                 | 0.45 | 47  | 5.1                      | 3 |
| <i>P. hispida</i>       | 4.1                                 | 0.30 | 104 | 4.1                      | 9 |
| <i>D. leucas</i>        | 4.3                                 | 0.05 | 2   | 3.9                      | 6 |
| <i>P. groenlandicus</i> | 3.7                                 | 0.32 | 11  |                          |   |
| <i>E. barbatus</i>      | 3.6                                 | 0.16 | 12  | 4.0                      | 4 |
| <i>O. rosmarus</i>      | 2.6                                 | 0.14 | 7   | 2.9                      | 6 |

**Supplementary Table 8.**  $\delta^{66}\text{Zn}$  based trophic level (TL) estimates following Supplementary Equation 2 and 3. SD = standard deviation, n = number of individuals/bone samples. Two extreme outlier samples based on their  $\delta^{66}\text{Zn}$  values from the QjJx-1 site (*P. hispida* 1.00 ‰; *E. barbatus* 1.39 ‰) and one based on its  $\delta^{15}\text{N}$  value from the JfEl-4 site (*D. leucas*? 11.82 ‰) were excluded. Additionally, only cortical bone  $\delta^{66}\text{Zn}$  values for *O. rosmarus* from the QjJx-1 site were used.

| Species                 | Supplementary Equation 2  |      | Supplementary Equation 3  |      | n   |
|-------------------------|---------------------------|------|---------------------------|------|-----|
|                         | $\delta^{66}\text{Zn}$ TL | SD   | $\delta^{66}\text{Zn}$ TL | SD   |     |
| <i>U. maritimus</i>     | 5.01                      | 0.44 | 5.03                      | 0.42 | 47  |
| <i>P. hispida</i>       | 4.12                      | 0.29 | 4.18                      | 0.27 | 104 |
| <i>D. leucas</i>        | 3.66                      | 0.04 | 3.74                      | 0.04 | 2   |
| <i>P. groenlandicus</i> | 4.21                      | 0.39 | 4.27                      | 0.37 | 11  |
| <i>E. barbatus</i>      | 3.28                      | 0.56 | 3.37                      | 0.54 | 12  |
| <i>O. rosmarus</i>      | 4.02                      | 0.26 | 4.09                      | 0.25 | 7   |

## Additional References

77. Stein, R. & MacDonald, R. W. *The organic carbon cycle in the Arctic Ocean*. (Springer, 2004).
78. Lynch-Stieglitz, J., Stocker, T. F., Broecker, W. S. & Fairbanks, R. G. The influence of air-sea exchange on the isotopic composition of oceanic carbon: Observations and modeling. *Global Biogeochem. Cycles*, **9**, 653-665 (1995).
79. Hobson, K. A., Ambrose Jr, W. G. & Renaud, P. E. Sources of primary production, benthic-pelagic coupling, and trophic relationships within the Northeast Water Polynya: insights from  $\delta^{13}\text{C}$  and  $\delta^{15}\text{N}$  analysis. *Mar. Ecol. Prog. Ser.* **128**, 1-10 (1995).
80. France, R., Loret, J., Mathews, R. & Springer, J. Longitudinal variation in zooplankton  $\delta^{13}\text{C}$  through the Northwest Passage: inference for incorporation of sea-ice POM into pelagic foodwebs. *Polar Biol.* **20**, 335-341 (1998).
81. Sørensen, J. E., Hop, H., Carroll, M. L., Falk-Petersen, S. & Hegseth, E. N. Seasonal food web structures and sympagic–pelagic coupling in the European Arctic revealed by stable isotopes and a two-source food web model. *Prog. Oceanogr.* **71**, 59-87 (2006).
82. Goni, M. A., Yunker, M. B., Macdonald, R. W. & Eglinton, T. I. Distribution and sources of organic biomarkers in arctic sediments from the Mackenzie River and Beaufort Shelf. *Mar. Chem.* **71**, 23-51 (2000).
83. Parsons, T. R. et al. Autotrophic and heterotrophic production in the Mackenzie River/Beaufort Sea estuary. *Polar Biol.* **9**, 261-266 (1989).
84. Dittmar, T. & Kattner, G. The biogeochemistry of the river and shelf ecosystem of the Arctic Ocean: a review. *Mar. Chem.* **83**, 103-120 (2003).
85. Pons, M. L. et al. A Zn isotope perspective on the rise of continents. *Geobiology*, **11**, 201-214 (2013).
86. Isson, T. T. et al. Tracking the rise of eukaryotes to ecological dominance with zinc isotopes. *Geobiology*, **16**, 341-352 (2018).
87. Maréchal, C. N., Nicolas, E., Douchet, C. & Albarède, F. Abundance of zinc isotopes as a marine biogeochemical tracer. *Geochem. Geophys. Geosyst.* **1**, 1015 (2000).
88. John, S. G. *The Marine Biogeochemistry of Zinc Isotopes*. [Doctoral Thesis]. (Massachusetts Institute of Technology, 2007).
89. Twining, B. S. & Baines, S. B. The trace metal composition of marine phytoplankton. *Ann. Rev. Mar. Sci.* **5**, 191-215 (2013).
90. Vance, D., de Souza, G. F., Zhao, Y., Cullen, J. T. & Lohan, M. C. The relationship between zinc, its isotopes, and the major nutrients in the North-East Pacific. *Earth Planet. Sci. Lett.* **525**, 115748 (2019).
91. Jensen, L. T. et al. Biogeochemical cycling of dissolved zinc in the Western Arctic (Arctic GEOTRACES GN01). *Global Biogeochem. Cycles* **33**, 343-369 (2019).
92. Lowry, L. F., Frost, K. J. & Burns, J. J. Variability in the diet of ringed seals, *Phoca hispida*, in Alaska. *Can. J. Fish. Aquat. Sci.* **37**, 2254-2261 (1980).
93. Born, E. W., Teilmann, J., Acquarone, M. & Riget, F. F. Habitat use of ringed seals (*Phoca hispida*) in the North Water area (North Baffin Bay). *Arctic* **57**, 129-142 (2004).
94. Laidre, K. L., Stirling, I., Estes, J. A., Kochnev, A. & Roberts, J. Historical and potential future importance of large whales as food for polar bears. *Front. Ecol. Environ.* **16**, 515-524 (2018).
95. Magnusson, B., Näykki, T., Hovind, H. & Krysell, M. *Handbook for the calculation of measurement uncertainty in environmental laboratories*. (Nordtest Technical Report 537, 2012).
96. Tang, Y., Chappell, H. F., Dove, M. T., Reeder, R. J. & Lee, Y. J. Zinc incorporation into hydroxylapatite. *Biomaterials* **30**, 2864-2872 (2009).

97. Mayer, I., Apfelbaum, F. & Featherstone, J. D. B. Zinc ions in synthetic carbonated hydroxyapatites. *Arch. Oral Biol.* **39**, 87-90 (1994).
98. Murray, E. J. & Messer, H. H. Turnover of bone zinc during normal and accelerated bone loss in rats. *J. Nutr.* **111**, 1641-1647 (1981).
99. Hedges, R. E. Bone diagenesis: an overview of processes. *Archaeometry* **44**, 319-328 (2002).
100. Trueman, C. N., Behrensmeyer, A. K., Tuross, N. & Weiner, S. Mineralogical and compositional changes in bones exposed on soil surfaces in Amboseli National Park, Kenya: diagenetic mechanisms and the role of sediment pore fluids. *J. Archaeol. Sci.* **31**, 721-739 (2004).
101. Reynard, B. & Balter, V. Trace elements and their isotopes in bones and teeth: Diet, environments, diagenesis, and dating of archeological and paleontological samples. *Palaeogeogr. Palaeoclimatol. Palaeoecol.* **416**, 4-16 (2014).
102. Twining, B. S., Rauschenberg, S., Morton, P. L. & Vogt, S. Metal contents of phytoplankton and labile particulate material in the North Atlantic Ocean. *Prog. Oceanogr.* **137**, 261-283 (2015).
103. Lone, K., Hamilton, C. D., Aars, J., Lydersen, C. & Kovacs, K. M. Summer habitat selection by ringed seals (*Pusa hispida*) in the drifting sea ice of the northern Barents Sea. *Polar Res.* **38**, 3483 (2019).
104. Iken, K., Bluhm, B. A. & Gradinger, R. Food web structure in the high Arctic Canada Basin: evidence from  $\delta^{13}\text{C}$  and  $\delta^{15}\text{N}$  analysis. *Polar Biol.* **28**, 238-249 (2005).
105. Pauly, D., Trites, A. W., Capuli, E. & Christensen, V. Diet composition and trophic levels of marine mammals. *ICES J. Mar. Sci.* **55**, 467-481 (1998).
106. Woollett, J. Oakes Bay 1: A preliminary reconstruction of a Labrador Inuit seal hunting economy in the context of climate change. *Geogr. Tidsskr.* **110**, 245-259 (2010).
107. Stirling, I. & Archibald, W. R. Aspects of predation of seals by polar bears. *J. Fish. Res. Board Can.* **34**, 1126-1129 (1977).
108. Pilfold, N. W., Derocher, A. E., Stirling, I. & Richardson, E. Polar bear predatory behaviour reveals seascape distribution of ringed seal lairs. *Popul. Ecol.* **56**, 129-138 (2014).
109. Elorriaga-Verplancken, F., Auriolles-Gamboa, D., Newsome, S. D. & Martínez-Díaz, S. F.  $\delta^{15}\text{N}$  and  $\delta^{13}\text{C}$  values in dental collagen as a proxy for age-and sex-related variation in foraging strategies of California sea lions. *Mar. Biol.* **160**, 641-652 (2013).
110. Hauser, D. D., Laidre, K. L., Suydam, R. S. & Richard, P. R. Population-specific home ranges and migration timing of Pacific Arctic beluga whales (*Delphinapterus leucas*). *Polar Biol.* **37**, 1171-1183 (2014).
111. Haug, T. et al. Trophic level and fatty acids in harp seals compared with common minke whales in the Barents Sea. *Mar. Biol. Res.* **13**, 919-932 (2017).
112. Fisher, K. I. & Stewart, R. E. A. Summer foods of Atlantic walrus, *Odobenus rosmarus rosmarus*, in northern Foxe Basin, Northwest Territories. *Can. J. Zool.* **75**, 1166-1175 (1997).
113. France, R. L. Carbon-13 enrichment in benthic compared to planktonic algae: foodweb implications. *Mar. Ecol. Prog. Ser.* **124**, 307-312 (1995).
114. Darwent, J., Mason, O. K., Hoffecker, J. F. & Darwent, C. M. 1,000 years of house change at Cape Epsenberg, Alaska: A case study in horizontal stratigraphy. *Am. Antiq.* **78**, 433-455 (2013).
115. Morrison, D. A. Thule Sea Mammal Hunting in the Western Central Arctic. *Arctic Anthropol.* **20**, 61-78 (1983).
116. McGhee, R. *The Palaeoeskimo Occupations at Port Refuge, High Arctic Canada*. Archaeology Survey of Canada Paper 92. (Ottawa: National Museums of Canada, 1979).
117. Helmer, J. W. The Palaeo-Eskimo Prehistory of the North Devon Lowlands. *Arctic* **44**, 301-317 (1991).
118. Kotar K. *Variability in Thule Inuit Subsistence Economy: A Faunal Analysis of OkRn-1, Banks Island, N.W.T.* [M.A. Thesis]. (London, Ontario: The University of Western Ontario, 2016).

119. Manning T. H. Narrative of a Second Defence Research Board Expedition to Banks Island, with Notes on the Country and Its History. *Arctic* **9**, 3-77 (1956).
120. Rick, A. M. Non-Cetacean Vertebrate Remains from Two Thule Winter Houses on Somerset Island, N.W.T. *Can. J. Archaeol.* **4**, 99-117 (1980).
121. Savelle, J. M. & Habu, J. A Processual Investigation of a Thule Whale Bone House, Somerset Island, Arctic Canada. *Arctic Anthropol.* **41**, 204-221 (2004).
122. Staab, M. L. *Analysis of faunal material recovered from a Thule Eskimo site on the Island of Silumiut, N.W.T., Canada*. In: *Thule Eskimo Culture: An Anthropological Retrospective. Archaeological Survey of Canada Paper No. 88*, (Ed. McCartney A. P.), 349-379 (Ottawa: National Museums of Canada, 1979).
123. Thompson, A. K. *A Zooarchaeological Analysis of a Late Dorset Faunal Assemblage from the KcFs-2 Site (Nunavik, Quebec)*. [M.A. Thesis]. (Montréal, QC: Université de Montréal, 2011).
124. Badgley, I. Stratigraphy and Habitation Features at DIA. 4 (JfE 1-4), a Dorset Site in Arctic Quebec. *Arctic* **33**, 569-584 (1980).
125. Stenton, D. R. Recent Archaeological Investigations in Frobisher Bay, Baffin Island, N.W.T. *Can. J. Archaeol.* **11**, 13-48 (1987).
126. Howse, L. Revisiting an Early Thule Inuit occupation of Skraeling Island, Canadian High Arctic. *Etud Inuit*, **37**, 103-125. (2013).
