# Supplementary material for: Advantages of zinc isotopes as a new dietary proxy in marine ecology
Source: Research Square preprint supplement (doi:10.21203/rs.3.rs-102358/v1), 2020-12-02
Supplement: Supplementary file 3 [file 962fe91ba0365146fd51b4f1.xlsx]

## Sheet: Bone samples
Sample Number	Site	Location	Species	d13C (‰ VPDB)	d15N (‰ AIR)	wt. %C	wt. %N	C/N	d66Zn (JMC Lyon)	d67Zn (JMC Lyon)	d68Zn (JMC Lyon)	[Zn] (µg/g)
9531	OkRn-1	(aka Agvik Site) Banks Island	Pusa hispida	-15.7139	18.6264	40.1748	14.2954	3.27756	0.399959	0.578183	0.816308	187.607
9532	OkRn-1	(aka Agvik Site) Banks Island	Pusa hispida	-15.5384	18.9452	40.2348	14.3698	3.26451	0.42175	0.642001	0.884073	150.692
9533	OkRn-1	(aka Agvik Site) Banks Island	Pusa hispida	-15.5943	17.9264	40.3504	14.3746	3.2735	0.422778	0.645714	0.85392	123.131
9535	OkRn-1	(aka Agvik Site) Banks Island	Pusa hispida	-15.87	18.2054	40.4711	14.3492	3.2891	0.484119	0.765352	0.983759	119.409
8536	OkRn-1	(aka Agvik Site) Banks Island	Pusa hispida	-16.1598	18.3821	41.4661	14.7461	3.27868	0.430307	0.45516	0.912326	94.5163
4236	OkRn-1	(aka Agvik Site) Banks Island	Pusa hispida	-15.5892	18.549	42.3541	14.9204	3.24335	0.576253	0.89265	1.07407	92.9581
4240	OkRn-1	(aka Agvik Site) Banks Island	Pusa hispida	-15.2456	18.1904	40.6135	14.7192	3.21862	0.54701	0.841023	1.05664	125.539
4243	OkRn-1	(aka Agvik Site) Banks Island	Pusa hispida	-16.1	18.5567	42.6132	15.1075	3.29012	0.544673	0.903417	1.14324	112.229
4244	OkRn-1	(aka Agvik Site) Banks Island	Ursus maritimus	-14.9477	22.4985	44.0841	14.8662	3.45963	0.294271	0.41442	0.70587	144.662
9530	OkRn-1	(aka Agvik Site) Banks Island	Ursus maritimus	-14.4714	23.6544	41.1786	14.8137	3.24162	0.0673759	0.0302703	0.226655	181.683
9489	OlRr-1	(aka Agvik Site) Banks Island	Ursus maritimus	-14.9307	23.0186	40.6242	14.5246	3.26171	0.257627	0.298477	0.609039	133.59
9497	OlRr-1	(aka Agvik Site) Banks Island	Ursus maritimus	-14.9838	23.9618	41.6077	14.9881	3.23725	0.0652838	-0.0462747	0.212276	261.993
4946	NkRi-3	(Tiktalik) Amundsen Gulf	Most likely Pusa hispida	-16.764	18.8633	44.1362	13.6858	3.75739	0.511987	0.846221	1.05973	190.031
4945	NkRi-3	(Tiktalik) Amundsen Gulf	Most likely Pusa hispida	-16.4687	18.4515	43.3684	14.7131	3.43797	0.580917	0.980332	1.22188	160.231
4944	NkRi-3	(Tiktalik) Amundsen Gulf	Most likely Pusa hispida	-16.2941	18.0052	44.4597	14.9583	3.46845	0.513308	0.905088	1.09488	194.888
4942	NkRi-3	(Tiktalik) Amundsen Gulf	Most likely Pusa hispida	-16.7377	18.4053	42.9478	14.2767	3.50863	0.47978	0.781395	0.990578	227.852
4948	NkRi-3	(Tiktalik) Amundsen Gulf	Most likely Pusa hispida	-16.95	18.0466	44.5291	14.4965	3.5846	0.462349	0.756725	0.990247	195.356
8010	KkDo-1	Baffin Island	Pusa hispida	-13.5014	15.6341	40.5936	13.5493	3.49453	0.661952	1.13025	1.31746	109.349
8011	KkDo-1	Baffin Island	Pusa hispida	-13.5872	15.1455	40.1758	13.6438	3.43393	0.540864	0.885017	1.07322	128.626
8014	KkDo-1	Baffin Island	Pusa hispida	-14.5173	15.942	40.6013	13.9695	3.38942	0.480224	0.798879	1.03877	167.861
8735	KkDo-1	Baffin Island	Pusa hispida	-13.7756	15.5734	40.7484	14.4835	3.28096	0.552159	0.883948	1.08858	124.164
8678	KkDo-1	Baffin Island	Pusa hispida	-13.4059	15.5938	39.8277	14.0878	3.29691	0.592966	0.955739	1.22036	186.662
8026	KkDo-1	Baffin Island	Pusa hispida	-13.3949	15.3598	41.0261	14.3996	3.32281	0.524189	0.819161	1.04954	184.087
7984	KkDo-1	Baffin Island	Pusa hispida	-13.0257	15.6621	40.3686	14.1851	3.31877	0.634809	0.939261	1.3041	139.451
7989	KkDo-1	Baffin Island	Pusa hispida	-13.4894	15.5378	40.4844	14.1945	3.32619	0.610936	0.981228	1.25741	240.359
8686	KkDo-1	Baffin Island	Pusa hispida	-13.4699	15.2703	40.0312	14.1765	3.29324	0.456564	0.704162	0.959622	180.689
8757	KkDo-1	Baffin Island	Pagophilus groenlandicus	-14.0305	14.504	42.2263	15.1032	3.26047	0.621783	1.07765	1.35591	87.2029
8758	KkDo-1	Baffin Island	Pagophilus groenlandicus	-14.3546	14.7808	42.2815	14.9946	3.28839	0.655616	1.08201	1.37353	88.8794
8759	KkDo-1	Baffin Island	Pagophilus groenlandicus	-14.4952	14.4704	41.3184	14.6347	3.29248	0.497288	0.834627	1.04989	110.202
8760	KkDo-1	Baffin Island	Pagophilus groenlandicus	-14.2738	16.1957	41.4055	14.8136	3.25962	0.461892	0.791281	0.976487	100.659
8761	KkDo-1	Baffin Island	Pagophilus groenlandicus	-14.5281	14.0855	41.9365	15.0553	3.24883	0.557883	0.91714	1.17327	200.367
8762	KkDo-1	Baffin Island	Pagophilus groenlandicus	-14.4334	13.8372	41.0116	14.6083	3.27395	0.520341	0.888584	1.12778	139.068
8763	KkDo-1	Baffin Island	Pagophilus groenlandicus	-14.6109	15.2192	42.5891	15.0675	3.29672	0.507372	0.888956	1.09493	128.849
7997	KkDo-1	SW Baffin Island	Ursus maritimus	-13.3878	19.8003	40.6997	14.3945	3.29726	0.315337	0.416811	0.723347	264.596
7999	KkDo-1	SW Baffin Island	Ursus maritimus	-13.3148	20.4	40.1886	14.3878	3.25747	0.362081	0.49942	0.810574	256.677
8195	NaPi-2	Coronation Gulf in the western Canadian Arctic	Pusa hispida	-16.1532	19.1375	39.3933	13.7487	3.34139	0.479608	0.776623	0.996999	214.708
8204	NaPi-2	Coronation Gulf in the western Canadian Arctic	Pusa hispida	-16.3887	19.5617	39.619	13.9726	3.30662	0.488097	0.849551	1.06928	158.778
8225	NaPi-2	Coronation Gulf in the western Canadian Arctic	Pusa hispida	-16.5963	18.8591	41.387	14.5889	3.30924	0.44576	0.771985	0.980515	138.781
8203	NaPi-2	Coronation Gulf in the western Canadian Arctic	Pusa hispida	-16.014	18.9909	39.7263	13.7301	3.37424	0.643569	1.02861	1.32953	167.639
8207	NaPi-2	Coronation Gulf in the western Canadian Arctic	Pusa hispida	-15.2183	19.0024	39.3482	13.9067	3.29959	0.467507	0.795247	0.989937	140.112
8227	NaPi-2	Coronation Gulf in the western Canadian Arctic	Pusa hispida	-16.1812	18.6452	40.9083	14.4592	3.29939	0.460409	0.755927	0.952048	194.898
8232	NaPi-2	Coronation Gulf in the western Canadian Arctic	Pusa hispida	-15.7761	18.468	40.8136	14.3951	3.30646	0.486417	0.798924	1.02875	141.871
8244	JfEl-4	Diana Island, northern Quebec	Delphinapterus leucas	-11.2444	17.7508	42.3823	15.0991	3.27378	0.668036	0.985496	1.37503	380.657
8247	JfEl-4	Diana Island, northern Quebec	Delphinapterus leucas	-13.2142	18.1793	40.4596	13.9357	3.38595	0.648148	1.01816	1.33259	1024.57
8310	JfEl-4	Diana Island, northern Quebec	Delphinapterus leucas?	-13.2194	11.8178	40.2588	14.1802	3.3109	0.394618	0.757532	0.882146	177.914
8294	JfEl-4	Diana Island, northern Quebec	Most likely Pusa hispida	-13.5883	14.2535	40.2929	14.2036	3.30845	0.539067	0.871773	1.11034	320.959
8580	JfEl-4	Diana Island, northern Quebec	Most likely Pusa hispida	-13.8691	15.4353	40.9868	14.5538	3.28434	0.600627	0.954038	1.24129	155.554
8618	JfEl-4	Diana Island, northern Quebec	Most likely Pusa hispida	-13.8605	15.159	39.9461	14.1185	3.29953	0.479137	0.776275	1.01476	203.845
8617	JfEl-4	Diana Island, northern Quebec	Most likely Pusa hispida	-13.8919	16.0206	40.5784	14.2779	3.31433	0.597058	0.957616	1.22434	164.437
8602	JfEl-4	Diana Island, northern Quebec	Most likely Pusa hispida	-12.3455	15.9652	39.5611	13.9645	3.30382	0.391098	0.685786	0.834291	374.755
8266	JfEl-4	Diana Island, northern Quebec	Most likely Pusa hispida	-12.8619	15.4963	40.4803	14.303	3.30056	0.479135	0.783309	1.00322	216.238
8269	JfEl-4	Diana Island, northern Quebec	Most likely Pusa hispida	-13.7721	15.9804	39.9253	14.05	3.3139	0.558417	0.943448	1.1622	173.074
8610	JfEl-4	Diana Island, northern Quebec	Most likely Pusa hispida	-13.3723	15.0435	38.6332	13.6409	3.30286	0.749864	1.21289	1.56799	134.481
8631	JfEl-4	Diana Island, northern Quebec	Most likely Pusa hispida	-13.9672	15.2785	41.1981	14.7805	3.25055	0.690418	1.0832	1.41416	182.188
8586	JfEl-4	Diana Island, northern Quebec	Odobenus rosmarus	-13.36	11.16	40.6	14.5	3.27	0.47	0.69	1.07	215
8249	JfEl-4	Diana Island, northern Quebec	Ursus maritimus	-13.2253	19.8939	40.7804	14.5228	3.27477	0.334575	0.454708	0.795025	416.929
8252	JfEl-4	Diana Island, northern Quebec	Ursus maritimus	-13.4753	19.0254	40.3722	14.4319	3.26233	0.312692	0.409096	0.718749	296.588
8255	JfEl-4	Diana Island, northern Quebec	Ursus maritimus	-14.6165	18.6658	41.476	14.5225	3.33203	0.437306	0.605506	0.948974	404.982
8295	JfEl-4	Diana Island, northern Quebec	Ursus maritimus	-13.5289	21.571	39.8228	13.9105	3.33869	0.272491	0.377388	0.634362	665.367
8299	JfEl-4	Diana Island, northern Quebec	Ursus maritimus	-13.8468	16.7799	40.0356	14.1993	3.2882	0.341674	0.479431	0.77562	395.821
7524	SfFk-4	eastern Ellesmere Island (near Skraeling Island)	Pusa hispida	-13.8312	17.1263	41.2722	15.4056	3.1243	0.492942	0.791085	1.01396	110.052
7505	SfFk-4	eastern Ellesmere Island (near Skraeling Island)	Pusa hispida	-13.6034	17.6428	41.686	15.447	3.14713	0.479979	0.775332	0.98164	114.536
7506	SfFk-4	eastern Ellesmere Island (near Skraeling Island)	Pusa hispida	-13.7036	17.6927	41.5889	15.3136	3.16719	0.225816	0.39889	0.508166	122.674
7514	SfFk-4	eastern Ellesmere Island (near Skraeling Island)	Pusa hispida	-13.9673	17.0256	41.2869	15.2825	3.15045	0.487786	0.764443	0.998875	120.154
7520	SfFk-4	eastern Ellesmere Island (near Skraeling Island)	Pusa hispida	-14.2702	17.7696	41.1033	15.1566	3.16258	0.326609	0.56712	0.684031	128.248
7531	SfFk-4	eastern Ellesmere Island (near Skraeling Island)	Pusa hispida	-15.3892	17.2912	43.9489	14.6329	3.50249	0.312232	0.508709	0.635847	147.481
7544	SfFk-4	eastern Ellesmere Island (near Skraeling Island)	Pusa hispida	-13.921	16.4978	42.5581	15.4942	3.20324	0.283429	0.467991	0.610547	147.971
7497	SfFk-4	eastern Ellesmere Island (near Skraeling Island)	Pusa hispida	-14.0402	17.7293	43.0656	15.4694	3.24657	0.339412	0.562608	0.702088	201.579
7502	SfFk-4	eastern Ellesmere Island (near Skraeling Island)	Pagophilus groenlandicus	-13.9315	17.4518	41.4346	15.1006	3.19999	0.277638	0.513442	0.622876	139.325
7503	SfFk-4	eastern Ellesmere Island (near Skraeling Island)	Pagophilus groenlandicus	-13.6012	16.2667	41.622	15.285	3.1756	0.428395	0.731845	0.952616	81.5874
7504	SfFk-4	eastern Ellesmere Island (near Skraeling Island)	Pagophilus groenlandicus	-13.6708	17.262	41.5454	15.3476	3.15678	0.292297	0.534803	0.677855	133.773
7541	SfFk-4	eastern Ellesmere Island (near Skraeling Island)	Pagophilus groenlandicus	-14.0914	16.119	42.4568	15.4719	3.20035	0.223379	0.356121	0.523528	273.319
7568	SfFk-4	eastern Ellesmere Island (near Skraeling Island)	Ursus maritimus	-13.7427	22.992	42.6071	15.4228	3.22175	-0.0210864	-0.0372365	0.074437	222.35
8466	SfFk-4	eastern Ellesmere Island (near Skraeling Island)	Ursus maritimus	-13.471	21.9922	40.5072	14.4318	3.27314	0.00670929	-0.0759813	0.132145	417.351
8470	SfFk-4	eastern Ellesmere Island (near Skraeling Island)	Ursus maritimus	-13.0894	22.1518	40.1311	14.2386	3.28674	0.0439179	-0.0445738	0.179277	347.877
8473	SfFk-4	eastern Ellesmere Island (near Skraeling Island)	Ursus maritimus	-13.0776	22.12	40.3973	14.4825	3.25312	-0.0612264	-0.105402	0.0302959	304.432
8477	SfFk-4	eastern Ellesmere Island (near Skraeling Island)	Ursus maritimus	-13.5539	23.0156	31.609	11.273	3.27675	0.046589	0.0747709	0.320501	210.198
3371	KTZ-304	Kotzebue Sound Alaska	Pusa hispida	-13.711	17.7521	41.5582	14.5152	3.33984	0.460918	0.688333	0.948702	130.039
3370	KTZ-304	Kotzebue Sound Alaska	Pusa hispida	-13.2544	17.6812	41.277	14.3694	3.35128	0.456955	0.717956	0.959736	145.816
3374	KTZ-304	Kotzebue Sound Alaska	Pusa hispida	-13.3446	18.4207	41.9378	14.5173	3.37076	0.49381	0.831412	1.06165	147.329
3389	KTZ-304	Kotzebue Sound Alaska	Pusa hispida	-13.0551	17.2102	42.3308	15.0116	3.29022	0.50369	0.869201	1.06519	130.108
3379	KTZ-304	Kotzebue Sound Alaska	Pusa hispida	-13.5313	18.2035	41.7075	14.289	3.40675	0.567701	0.887578	1.17721	139.954
3403	KTZ-87	Kotzebue Sound Alaska	Pusa hispida	-12.9741	18.0496	41.392	14.5953	3.30842	0.565776	0.916587	1.17483	146.932
3405	KTZ-87	Kotzebue Sound Alaska	Pusa hispida	-12.8417	18.808	42.1489	14.8488	3.3136	0.567318	0.938268	1.18552	121.493
4695	QjJx-1	Little Cornwallis Island	Pusa hispida	-13.87	19.24	43.03	14.89	3.37	0.64	0.93	1.23	139
4721	QjJx-1	Little Cornwallis Island	Pusa hispida	-13.57	18.04	41.26	14.51	3.32	0.29	0.43	0.6	124
4733	QjJx-1	Little Cornwallis Island	Pusa hispida	-12	16.69	42.64	15.22	3.27	0.3	0.29	0.55	170
4767	QjJx-1	Little Cornwallis Island	Pusa hispida	-13.48	18.02	42.97	15.18	3.3	0.34	0.52	0.71	134
4768	QjJx-1	Little Cornwallis Island	Pusa hispida	-13.27	17.19	43.75	15.4	3.31	0.35	0.65	0.79	187
4775	QjJx-1	Little Cornwallis Island	Pusa hispida	-13.35	15.42	41.72	15.24	3.19	0.42	0.59	0.86	205
4787	QjJx-1	Little Cornwallis Island	Pusa hispida	-12.94	17.62	46.17	15.98	3.37	0.39	0.62	0.8	83
4801	QjJx-1	Little Cornwallis Island	Pusa hispida	-12.58	17.53	46.15	16.47	3.27	0.45	0.7	0.89	101
4811	QjJx-1	Little Cornwallis Island	Pusa hispida	-13.05	15.49	44.37	15.42	3.36	1	1.69	1.99	210
4817	QjJx-1	Little Cornwallis Island	Pusa hispida	-12.68	16.59	45.35	16.16	3.27	0.39	0.56	0.82	138
4846	QjJx-1	Little Cornwallis Island	Pusa hispida	-13.97	19.27	42.66	14.55	3.42	0.34	0.54	0.67	120
4916	QjJx-1	Little Cornwallis Island	Pusa hispida	-14.47	18.09	42.13	14.56	3.37	0.46	0.76	0.89	131
4696	QjJx-1	Little Cornwallis Island	Ursus maritimus	-13.64	21.49	42.12	14.99	3.28	0.2	0.38	0.41	125
4702	QjJx-1	Little Cornwallis Island	Ursus maritimus	-13.76	21.14	41.82	14.43	3.38	0.09	0.16	0.2	173
4717	QjJx-1	Little Cornwallis Island	Ursus maritimus	-13.78	22.45	42.67	15.05	3.31	0.07	0.19	0.22	147
4755	QjJx-1	Little Cornwallis Island	Ursus maritimus	-13.51	21.38	41.87	14.57	3.35	0.09	0.23	0.21	143
4766	QjJx-1	Little Cornwallis Island	Ursus maritimus	-13.39	20.32	42.27	14.97	3.29	0.19	0.27	0.37	89
4773	QjJx-1	Little Cornwallis Island	Ursus maritimus	-12.74	20.76	43.64	15.49	3.29	0.06	0.1	0.08	80
4875	QjJx-1	Little Cornwallis Island	Ursus maritimus	-14.04	24.05	42.88	14.98	3.34	0.01	0.09	0.08	172
4884	QjJx-1	Little Cornwallis Island	Ursus maritimus	-13.34	22.25	43.08	15.18	3.31	0.05	0.08	0.16	141
4891	QjJx-1	Little Cornwallis Island	Ursus maritimus	-13.08	20.99	42.78	15.18	3.29	0.13	0.19	0.2	124
4722	QjJx-1	Little Cornwallis Island	Ursus maritimus	-14.16	24.41	43.35	14.9	3.39	0.08	0.17	0.19	153
6060	QkHn-13	North shore of Devon Island	Pusa hispida	-15.3956	16.8656	42.2664	14.2388	3.46187	0.47578	0.775895	1.0336	162.453
6047	QkHn-13	North shore of Devon Island	Pusa hispida	-14.906	17.0633	42.0877	14.5975	3.36225	0.534747	0.858509	1.15594	138.136
6053	QkHn-13	North shore of Devon Island	Pusa hispida	-15.3989	16.7358	42.1669	14.2172	3.45855	0.749133	1.1644	1.5334	115.884
6084	QkHn-13	North shore of Devon Island	Pusa hispida	-15.0333	16.7522	42.6386	14.7751	3.36647	0.601522	0.950551	1.25518	131.115
6095	QkHn-13	North shore of Devon Island	Pusa hispida	-15.621	16.6382	43.2831	14.9275	3.38309	0.676582	1.06282	1.36918	140.023
6010	QkHn-13	North shore of Devon Island	Pusa hispida	-13.0463	17.0803	41.5637	14.3103	3.38716	0.559434	0.900025	1.15468	162.393
6047	QkHn-13	North shore of Devon Island	Pusa hispida	-12.9488	16.4181	42.5672	14.7674	3.36191	0.762682	1.16614	1.58347	148.508
6088	QkHn-13	North shore of Devon Island	Pusa hispida	-14.9324	17.1375	43.4364	15.3301	3.30603	0.585246	0.894261	1.20078	101.488
6027	QkHn-13	North shore of Devon Island	Pusa hispida	-14.5234	17.2405	41.6793	14.2246	3.41722	0.463505	0.747684	0.975799	189.404
6004	QkHn-13	North shore of Devon Island	Ursus maritimus	-13.0771	20.6452	42.4361	14.9038	3.3203	0.198912	0.234558	0.511422	203.572
6025	QkHn-13	North shore of Devon Island	Ursus maritimus	-13.3697	22.2189	42.6403	14.845	3.34961	0.193292	0.19634	0.494078	232.757
6087	QkHn-13	North shore of Devon Island	Ursus maritimus	-14.0107	23.3723	43.8952	15.3572	3.33466	0.188184	0.207848	0.491137	323.916
6114	QkHn-13	North shore of Devon Island	Ursus maritimus	-13.3596	22.1407	43.7814	15.6691	3.25981	0.215564	0.935369	0.529738	218.174
4346	KcFs-2	Nuvuk Island, northern Quebec	Most likely P. hispida	-14.9793	16.3246	42.5934	14.6751	3.3853	0.563005	0.873899	1.18779	153.293
4302	KcFs-2	Nuvuk Island, northern Quebec	Most likely P. hispida	-14.2724	16.8139	42.2062	14.7781	3.33112	0.491883	0.764031	1.04401	210.467
4330	KcFs-2	Nuvuk Island, northern Quebec	Most likely P. hispida	-14.8982	16.6446	40.9697	14.4356	3.30996	0.612346	0.999769	1.30659	168.104
4303	KcFs-2	Nuvuk Island, northern Quebec	Most likely P. hispida	-15.1673	16.9235	42.4309	14.5927	3.39157	0.516354	0.82327	1.09915	287.896
4345	KcFs-2	Nuvuk Island, northern Quebec	Most likely P. hispida	-14.5075	16.4011	42.1845	14.7261	3.34146	0.525245	0.854895	1.10398	147.877
6261	RbJu-1	NW portion of Devon Island	Pusa hispida	-14.6288	16.748	43.8802	15.2279	3.36047	0.477427	0.779467	0.987795	84.0984
6263	RbJu-1	NW portion of Devon Island	Pusa hispida	-14.4287	16.284	42.125	15.0859	3.25647	0.478807	0.833852	0.975606	109.849
6253	RbJu-1	NW portion of Devon Island	Pusa hispida	-13.7812	16.3506	43.0145	15.2337	3.29257	0.454134	0.733839	0.927056	138.408
6245	RbJu-1	NW portion of Devon Island	Pusa hispida	-16.3131	16.0379	42.4067	14.2586	3.46839	0.63857	1.04105	1.30661	165.044
6247	RbJu-1	NW portion of Devon Island	Pusa hispida	-15.2507	16.0233	42.8065	14.9465	3.3399	0.641295	0.978434	1.32613	155.641
6232	RbJu-1	NW portion of Devon Island	Pusa hispida	-15.0955	16.9226	41.9919	14.2647	3.43284	0.539726	0.730339	1.13389	83.9192
6200	RbJu-1	NW portion of Devon Island	Ursus maritimus	-14.5206	23.7673	42.3979	14.3367	3.44936	0.297807	0.385533	0.684282	382.965
6293	RbJu-1	NW portion of Devon Island	Ursus maritimus	-13.8864	23.863	43.253	14.8745	3.39194	0.225106	0.311525	0.555308	405.34
6299	RbJu-1	NW portion of Devon Island	Ursus maritimus	-15.0406	24.1928	42.141	14.4261	3.40723	0.113624	0.189976	0.327302	379.052
6750	RbJu-1	NW portion of Devon Island	Ursus maritimus	-14.2279	22.6999	40.9879	14.1592	3.38218	-0.016758	-0.0384245	0.0938152	379.947
6756	RbJu-1	NW portion of Devon Island	Ursus maritimus	-13.8204	22.4214	42.6065	14.4242	3.4453	0.0445804	0.0235564	0.220459	236.323
6757	RbJu-1	NW portion of Devon Island	Ursus maritimus	-13.7122	23.4396	42.8511	14.6425	3.41506	0.0583182	0.0523156	0.201664	287.205
7789	KkJg-1	NW shore of Hudson Bay Silumiut site	Pusa hispida	-14.9407	16.7694	39.6617	13.8253	3.345	0.447444	0.696668	0.946039	210.02
7785	KkJg-1	NW shore of Hudson Bay Silumiut site	Pusa hispida	-14.7453	17.1329	41.0606	14.1626	3.38099	0.499752	0.729239	1.02317	599.127
7765	KkJg-1	NW shore of Hudson Bay Silumiut site	Pusa hispida	-14.8927	17.3189	39.9707	14.1386	3.29692	0.542398	0.826984	1.11994	106.916
7731	KkJg-1	NW shore of Hudson Bay Silumiut site	Pusa hispida	-14.9533	17.5763	41.0343	14.123	3.38843	0.361161	0.534501	0.722173	877.957
7709	KkJg-1	NW shore of Hudson Bay Silumiut site	Pusa hispida	-14.7318	17.0019	39.8398	14.1471	3.28394	0.366768	0.604251	0.754898	160.61
7702	KkJg-1	NW shore of Hudson Bay Silumiut site	Pusa hispida	-15.0522	17.3232	40.3241	13.9124	3.38026	0.465754	0.671649	0.950597	102.04
7763	KkJg-1	NW shore of Hudson Bay Silumiut site	Pusa hispida	-15.4215	16.7181	40.1616	13.7932	3.39572	0.519873	0.826171	1.06913	148.206
7736	KkJg-1	NW shore of Hudson Bay Silumiut site	Pusa hispida	-14.9526	16.4701	40.7399	13.6977	3.46845	0.297989	0.461141	0.605319	610.754
7817	KkJg-1	NW shore of Hudson Bay Silumiut site	Pusa hispida	-14.7253	17.4565	41.2901	14.4365	3.33529	0.583956	0.877107	1.195	119.601
7820	KkJg-1	NW shore of Hudson Bay Silumiut site	Pusa hispida	-14.2938	17.4899	40.1732	14.031	3.33874	0.503614	0.776936	1.02315	138.867
7825	KkJg-1	NW shore of Hudson Bay Silumiut site	Pusa hispida	-14.8384	16.5226	40.1426	14.0805	3.3247	0.52592	0.785657	1.07348	108.571
7739	KkJg-1	NW shore of Hudson Bay Silumiut site	Ursus maritimus	-14.5812	18.685	40.3553	13.8772	3.39101	0.336675	0.545155	0.695599	901.413
7795	KkJg-1	NW shore of Hudson Bay Silumiut site	Ursus maritimus	-14.0662	18.847	41.3991	14.684	3.28774	0.559647	0.8495	1.14965	526.656
7807	KkJg-1	NW shore of Hudson Bay Silumiut site	Ursus maritimus	-13.841	20.6206	41.6488	14.7343	3.29642	0.133081	0.200365	0.394064	473.117
7867	KkJg-1	NW shore of Hudson Bay Silumiut site	Ursus maritimus	-13.8518	18.9637	41.0937	14.7719	3.24421	0.733962	1.17949	1.55426	120.498
2707	PaJs-13	Somerset Island	Pusa hispida	-15.1124	17.8189	42.5217	14.1531	3.50383	0.486075	0.826479	1.00973	79.1939
2709	PaJs-13	Somerset Island	Pusa hispida	-15.3611	18.2223	42.8578	14.3113	3.4952	0.394442	0.590445	0.78779	133.061
2711	PaJs-13	Somerset Island	Pusa hispida	-15.3761	18.2244	42.1131	13.7976	3.56119	0.435091	0.645932	0.880567	122.472
2712	PaJs-13	Somerset Island	Pusa hispida	-15.2401	17.7237	42.7382	14.0662	3.54386	0.496826	0.764097	1.00738	122.354
2713	PaJs-13	Somerset Island	Pusa hispida	-13.8532	17.6601	40.8637	14.4072	3.30815	0.438929	0.727745	0.966215	189.922
2714	PaJs-13	Somerset Island	Pusa hispida	-13.6461	17.7776	44.1497	15.2973	3.3662	0.415093	0.655166	0.886045	114.555
2717	PaJs-13	Somerset Island	Pusa hispida	-13.6166	17.8274	39.6366	13.6134	3.39458	0.421887	0.706082	0.909901	113.953
2720	PaJs-13	Somerset Island	Pusa hispida	-14.0504	17.5653	43.0746	16.1627	3.11938	0.49857	0.800524	1.04653	116.817
2739	PaJs-13	Somerset Island	Pusa hispida	-14.6733	17.9113	42.5613	14.4039	3.44901	0.364018	0.61531	0.802406	85.7964
2	PaJs-13	Somerset Island	Ursus maritimus	-12.6405	22.2043	44.6	16.4	3.17144	0.104927	0.0153784	0.309077	190.282
3	PaJs-13	Somerset Island	Ursus maritimus	-12.488	22.6568	41.8	15.3	3.18604	0.048503	0.000802829	0.20531	187.976
4	PaJs-13	Somerset Island	Ursus maritimus	-12.5896	22.1541	40.1	14.8	3.15972	0.0944568	0.0806667	0.276737	214.031
8109	PcJq-5	Somerset Island	Ursus maritimus	-13.4997	20.8351	40.8238	14.1682	3.36032	0.186198	0.238365	0.49027	324.463
8327	PcJq-5	Somerset Island	Ursus maritimus	-12.5479	22.063	41.2732	14.5904	3.29899	0.108146	0.112115	0.304434	231.344
8517	PeJr-1	Somerset Island	Ursus maritimus	-12.9629	22.5912	40.3704	14.6379	3.21627	0.0819606	0.0484019	0.245138	293.499
8527	PeJr-1	Somerset Island	Ursus maritimus	-13.8807	22.9092	42.1094	14.5209	3.38178	-0.0257129	-0.128326	0.0563211	190.892
